# Supplementary material for: Evaluation of the digestion capability of ammonium bifluoride for the determination of major and trace elements in Ti-rich minerals by ICP-MS
Source: Royal Society of Chemistry journal article supplement (doi:10.1039/d3ja00012e), 2023-01-01
Supplement: d3ja00012e1.xlsx [file d3ja00012e1.xlsx]

## Sheet: Table S1
Table S1 Instrumental operation conditions of 7700 Q–ICP–MS
Agilent 7700 ICP-MS		Instrumental parameters
RF power		1500 W
Plasma gas		15 L min-1
Auxiliary gas		0.51 L min-1
Nebulizer gas		0.63 L min-1
Sampling depth		12 mm
Sample uptake rate		0.1 mL min-1
Torch		Normal torch (quartz glass)
Spray chamber		Scott double-pass type
Sampler aperture diameter		1.0 mm（Ni)
Skimmer aperture diameter		0.4 mm（Ni）
Deterctor mode		Dual (pulse and analog counting)
Scan mode		Peak hopping
Isotope		7Li, 9Be, 45Sc, 47Ti, 51V, 53Cr, 59Co, 63Cu
		66Zn, 71Ga, 85Rb, 88Sr, 89Y, 90Zr, 93Nb, 133Cs
		137Ba, 139La, 140Ce, 141Pr, 146Nd, 147Sm, 153Eu, 158Gd
		159Tb, 163Dy, 165Ho, 166Er, 169Tm, 172Yb, 175Lu, 178Hf
		181Ta, 205Tl, 208Pb, 232Th, 238U, 115In
Point per peak		1
Sweeps per replicate		3
Replicates		3
Dwell time		100 ms per mass

## Sheet: Table S2
Table S2 Element concentrations for the original fragments of RGPMR, PAK122, AFG200 and RUS100 measured by LA–ICP–MS
Sample	Li	Be	B	Na	Mg	Al	SiO2	P	K	CaO	Sc	TiO2	V	Cr	MnO	FeO	Co	Cu	Zn	Ga	Ge	As	Rb	Sr	Y	Zr	Nb	Mo	Ag	Cd	Sn	Sb	Cs	Ba	La	Ce	Pr	Nd	Sm	Eu	Gd	Tb	Dy	Ho	Er	Tm	Yb	Lu	Hf
Units	ppm	ppm	ppm	ppm	ppm	ppm	wt%	ppm	ppm	wt%	ppm	wt%	ppm	ppm	wt%	wt%	ppm	ppm	ppm	ppm	ppm	ppm	ppm	ppm	ppm	ppm	ppm	ppm	ppm	ppm	ppm	ppm	ppm	ppm	ppm	ppm	ppm	ppm	ppm	ppm	ppm	ppm	ppm	ppm	ppm	ppm	ppm	ppm	ppm
RGPMR	<LOD	1.8522	0.779693	5.72935	45.6254	67.2885	0.38715	56.6902	0.40202	0.00472102	152.991	96.6711	437.281	330.689	<LOD	1.24827	<LOD	1.6778	3.26634	0.426592	1.28302	0	<LOD	0.243248	0.0231765	223.117	7396.35	6.51562	1.63673	0.688876	1865.07	136.767	0.0190865	0.0256593	<LOD	<LOD	<LOD	<LOD	<LOD	<LOD	<LOD	<LOD	<LOD	<LOD	<LOD	<LOD	<LOD	<LOD	13.3687
RGPMR	<LOD	0.968626	0.794149	0.089104	42.8844	63.252	0.413714	45.5068	0.369813	0.00391789	147.18	96.8296	459.914	317.745	<LOD	1.15113	0.107242	1.69387	3.00085	0.307933	0.205445	1.3371	<LOD	0.197523	0.00537964	206.687	7202.07	6.85094	1.19502	0.322747	1589.36	114.994	0.00523007	0.0475972	<LOD	<LOD	<LOD	<LOD	<LOD	<LOD	<LOD	<LOD	<LOD	<LOD	<LOD	<LOD	<LOD	<LOD	12.5634
RGPMR	0.075149	1.20211	0.749759	7.40063	46.6516	57.3925	0.302824	61.966	<LOD	<LOD	143.423	97.0359	474.189	320.229	<LOD	1.09942	<LOD	1.75974	3.50143	0.378044	1.06489	<LOD	0.0516102	0.163061	<LOD	201.007	7132.74	5.25128	1.27754	0.431998	1425.65	91.5738	0.0214001	0.0220918	<LOD	<LOD	0.0135001	<LOD	<LOD	<LOD	<LOD	<LOD	<LOD	<LOD	<LOD	<LOD	<LOD	<LOD	12.6276
RGPMR	0.00758488	0.942671	1.49394	1.56315	41.6356	60.7732	0.321936	56.343	1.21199	<LOD	153.218	97.0977	540.93	335.305	<LOD	1.05406	<LOD	1.58027	2.96482	0.296087	0.291622	0.349139	<LOD	0.157496	0.0140908	188.399	7212.72	4.29752	1.51012	0.60848	1112.19	64.3523	0.0391136	0.0207258	<LOD	<LOD	<LOD	<LOD	<LOD	<LOD	<LOD	<LOD	<LOD	<LOD	<LOD	<LOD	<LOD	<LOD	11.4915
RGPMR	0.0613182	0.432853	0.533247	2.9393	34.3976	25.3601	0.210562	44.5917	<LOD	<LOD	121.043	97.7314	1238.02	515.001	<LOD	0.850044	0.0559725	4.33423	7.69766	0.311769	0.684655	0	<LOD	0.177804	0.00538145	214.556	4810.33	7.85612	2.2	0.174201	406.366	17.0638	0.015769	<LOD	<LOD	<LOD	<LOD	<LOD	<LOD	<LOD	<LOD	<LOD	<LOD	<LOD	<LOD	<LOD	<LOD	<LOD	11.823
RGPMR	<LOD	0.0990246	0.114677	3.51984	30.0462	29.212	0.119747	15.3943	2.62852	0.00159473	114.828	97.9642	1120.21	483.135	<LOD	0.792462	0.0797148	3.89806	8.42138	0.221378	1.20411	<LOD	0.0481262	0.118248	0.00982725	201.675	4517.55	6.31953	1.63995	0.0292831	381.685	16.473	<LOD	<LOD	<LOD	<LOD	<LOD	<LOD	<LOD	<LOD	<LOD	<LOD	<LOD	<LOD	<LOD	<LOD	<LOD	<LOD	11.127
RGPMR	0.113904	0.0899149	0.273953	4.97539	27.2283	26.7784	0.172875	32.317	<LOD	0.00184737	102.679	98.0584	1057.13	427.993	<LOD	0.732942	0.20372	3.58474	7.48412	0.157423	0.356548	0.112952	<LOD	0.144212	0.0222508	191.167	4147.96	5.56654	1.46377	0.143874	325.656	14.8159	0.0394968	<LOD	<LOD	<LOD	<LOD	<LOD	<LOD	<LOD	<LOD	<LOD	<LOD	<LOD	<LOD	<LOD	<LOD	<LOD	9.75035
RGPMR	<LOD	0.549165	1.0669	4.03154	23.9703	23.0225	0.182855	9.84637	<LOD	<LOD	93.6275	98.2051	958.686	395.352	<LOD	0.672468	<LOD	3.65153	5.02989	0.0871192	0.613664	0.486024	0.0490812	0.099039	0.00903268	175.112	3778.31	5.67224	1.44989	0.0755085	309.232	14.2348	0.0165679	0.0197735	<LOD	<LOD	<LOD	<LOD	<LOD	<LOD	<LOD	<LOD	<LOD	<LOD	<LOD	<LOD	<LOD	<LOD	9.27803
RGPMR	0.0106994	0.164301	<LOD	8.76997	24.0724	21.5455	0.145265	42.2546	7.58098	<LOD	86.3761	98.3512	887.235	369.816	<LOD	0.630386	0.127458	2.99839	6.68298	0.176785	0.679168	<LOD	0.0159903	0.0800329	0.00807823	157.111	3459.99	5.66376	1.37738	<LOD	287.66	12.9147	0.0279302	<LOD	<LOD	<LOD	<LOD	<LOD	<LOD	<LOD	<LOD	<LOD	<LOD	<LOD	<LOD	<LOD	<LOD	<LOD	8.35589
RGPMR	<LOD	0.726159	0.511041	0	26.7727	35.5025	0.202926	32.4789	<LOD	<LOD	73.306	98.2246	251.144	168.097	<LOD	0.684584	0.0685054	0.928392	2.33992	0.336478	0.373749	<LOD	<LOD	0.100356	0.00641826	111.639	3400.22	4.43746	0.670954	0.0695265	1213.25	126.566	<LOD	0.0560707	<LOD	<LOD	<LOD	<LOD	<LOD	<LOD	<LOD	<LOD	<LOD	<LOD	<LOD	<LOD	<LOD	<LOD	6.70407
RGPMR	<LOD	0.0744062	0	2.9732	29.1691	39.7021	0.225321	54.9966	<LOD	<LOD	82.7423	98.0191	284.283	187.163	<LOD	0.75544	0.117185	1.15469	1.86759	0.406626	0	0.201071	0.0208497	0.101333	<LOD	123.296	4019.06	6.29034	0.778975	0.078431	1344.54	125.648	<LOD	0.0157647	<LOD	<LOD	<LOD	<LOD	<LOD	<LOD	<LOD	<LOD	<LOD	<LOD	<LOD	<LOD	<LOD	<LOD	7.98715
RGPMR	0.0490716	0.325756	0.423133	4.5903	30.5685	36.6408	0.220395	42.8108	0.0840613	<LOD	89.8341	97.8732	313.27	184.38	<LOD	0.837826	<LOD	1.49969	2.75476	0.410014	0.453782	0.735002	<LOD	0.135055	0.0117593	128.674	4209.75	6.14847	1.2897	<LOD	1459.1	144.73	<LOD	<LOD	<LOD	<LOD	<LOD	<LOD	<LOD	<LOD	<LOD	<LOD	<LOD	<LOD	<LOD	<LOD	<LOD	<LOD	8.34747
RGPMR	0.0284932	0.267881	<LOD	4.27456	33.9277	36.5344	0.294693	52.3932	<LOD	<LOD	98.2557	97.6384	346.086	201.479	<LOD	0.909123	<LOD	1.42107	3.40345	0.435184	0.651684	<LOD	0.0468553	0.134208	0.00856427	144.803	4550.42	5.89927	0.834489	0.07316	1579.16	159.209	<LOD	0.0188578	<LOD	<LOD	<LOD	<LOD	<LOD	<LOD	<LOD	<LOD	<LOD	<LOD	<LOD	<LOD	<LOD	<LOD	8.99287
RGPMR	0.042373	0.195234	<LOD	4.39446	36.2672	36.6483	0.280719	54.2161	<LOD	<LOD	106.76	97.5088	369.914	228.861	<LOD	0.96484	0.0685006	1.66939	3.19171	0.619071	0.270579	0.490603	0.0153072	0.200001	0.00933389	153.673	4908.16	5.53572	1.04777	0.309217	1687.91	168.011	<LOD	0.0617712	<LOD	0.00516935	<LOD	<LOD	<LOD	<LOD	<LOD	<LOD	<LOD	<LOD	<LOD	<LOD	<LOD	<LOD	9.77682
RGPMR	<LOD	0.894101	<LOD	4.94815	38.5098	33.7057	0.228762	46.0609	1.77034	<LOD	203.591	97.0498	1703.48	3634.09	<LOD	0.744523	0.183816	2.79339	6.04856	0.424962	0.90077	0.380184	<LOD	0.122602	0.00532932	663.408	6003.8	10.603	1.92313	0.0916479	41.0868	3.83895	<LOD	<LOD	<LOD	<LOD	<LOD	<LOD	<LOD	<LOD	<LOD	<LOD	<LOD	<LOD	<LOD	<LOD	<LOD	<LOD	33.8079
RGPMR	<LOD	1.57664	3.92968	4.16009	47.0598	34.465	0.241746	54.5467	<LOD	<LOD	222.18	96.8086	1859.75	3833.93	<LOD	0.819157	0.260065	4.05391	7.02758	0.259631	0.213468	<LOD	0.00900059	0.169009	0.0115404	722.674	6479.31	13.1208	2.00806	0.192228	44.3312	3.27809	<LOD	<LOD	<LOD	<LOD	<LOD	<LOD	<LOD	<LOD	<LOD	<LOD	<LOD	<LOD	<LOD	<LOD	<LOD	<LOD	36.252
RGPMR	0.054654	1.51479	2.43635	1.74429	41.2394	39.926	0.305975	41.6835	2.34253	0.00322155	229.634	96.6531	1956.48	3994.81	<LOD	0.825111	0.485911	3.91811	8.82081	0.374757	0.851312	0.926131	0.0345762	0.181896	0.0479526	748.172	6741.14	12.663	2.0101	0.266847	45.4953	3.7682	<LOD	0.106217	<LOD	<LOD	<LOD	0.0217235	<LOD	<LOD	<LOD	<LOD	<LOD	<LOD	<LOD	<LOD	<LOD	<LOD	38.5413
RGPMR	0.0193668	0.834865	2.33976	7.28813	45.4377	45.3286	0.26963	66.7221	2.45501	0.0196063	246.568	96.4496	2104.91	4313.5	<LOD	0.885252	<LOD	5.05114	10.1448	0.393331	1.1162	<LOD	<LOD	0.144983	0.0329794	771.468	7191.73	13.7097	2.99507	0.114203	49.1545	4.181	0.0387592	0.0292506	<LOD	<LOD	<LOD	<LOD	<LOD	<LOD	<LOD	<LOD	<LOD	<LOD	<LOD	<LOD	<LOD	<LOD	40.3288
RGPMR	0.0550088	0.447306	0.900166	5.45282	51.1058	30.4835	0.30673	78.4702	0.0922174	<LOD	260.833	96.1425	2303.61	4748.54	<LOD	0.96945	0.285411	5.17728	9.20306	0.251459	0.0778388	<LOD	<LOD	0.155162	0.0282287	832.675	7771.86	14.9219	2.18525	<LOD	52.9191	4.14811	<LOD	<LOD	<LOD	<LOD	<LOD	0.0255649	<LOD	<LOD	<LOD	<LOD	<LOD	<LOD	<LOD	<LOD	<LOD	<LOD	44.0577
RGPMR	0.34206	<LOD	2.36333	5.45482	65.7896	40.6693	0.412776	82.3675	0.12798	<LOD	130.618	96.6566	798.781	306.839	<LOD	1.06426	<LOD	1.56237	6.62569	0.40401	2.56272	<LOD	<LOD	0.193933	0.0158351	196.127	7290.52	9.81849	1.50273	0.195354	2267.09	277.641	<LOD	0.0811131	<LOD	<LOD	<LOD	0.229387	<LOD	<LOD	<LOD	<LOD	<LOD	<LOD	<LOD	<LOD	<LOD	<LOD	12.1666
RGPMR	<LOD	<LOD	0.0826946	11.2321	63.178	44.2342	0.463221	68.5078	11.4706	<LOD	125.516	96.6021	817.855	295.763	<LOD	1.06008	<LOD	1.7339	5.53176	0.375164	1.835	<LOD	0.14186	0.197935	0.00538916	190.75	7352.36	8.73661	1.17977	0.0994085	2264.81	272.917	0.0274117	0.0827346	<LOD	<LOD	<LOD	<LOD	<LOD	<LOD	<LOD	<LOD	<LOD	<LOD	<LOD	<LOD	<LOD	<LOD	11.5157
RGPMR	<LOD	<LOD	1.87271	5.68247	62.2111	46.1331	0.56348	72.6504	<LOD	<LOD	123.261	96.5199	834.208	276.925	<LOD	1.05083	0.205086	1.73671	6.52981	0.202215	0.891181	0.319707	<LOD	0.21649	0.0157768	192.308	7303.2	8.83921	1.57376	0.290084	2219.5	271.814	0.00895924	0.215083	<LOD	<LOD	<LOD	<LOD	<LOD	<LOD	<LOD	<LOD	<LOD	<LOD	<LOD	<LOD	<LOD	<LOD	11.9475
RGPMR	<LOD	<LOD	1.00159	2.58563	69.0132	47.4053	0.451635	61.0723	7.87133	<LOD	121.209	96.5913	855.985	281.788	<LOD	1.06434	0.118297	1.63548	4.93548	0.565042	0.533766	<LOD	<LOD	0.220905	0.0110343	201.304	7405.21	10.3084	1.41715	0.40446	2260.59	281.943	0.0514665	0.112711	<LOD	<LOD	<LOD	<LOD	<LOD	<LOD	<LOD	<LOD	<LOD	<LOD	<LOD	<LOD	<LOD	<LOD	12.2235
RGPMR	0.24755	0.406002	<LOD	10.8718	58.1297	47.7588	0.403909	110.855	<LOD	<LOD	117.257	96.6135	866.479	281.271	<LOD	1.05961	0.0725351	2.39895	6.09589	0.524731	0.741068	0.138414	<LOD	0.28083	0.011226	192.925	7458.97	9.96025	1.20465	0.30761	2311.23	288.744	<LOD	0.143195	<LOD	<LOD	<LOD	<LOD	<LOD	<LOD	<LOD	<LOD	<LOD	<LOD	<LOD	<LOD	<LOD	<LOD	11.7523
RGPMR	0.124009	0.254878	0.902373	10.5452	56.1302	46.6657	0.438088	69.1673	10.5391	<LOD	104.701	96.5811	810.277	261.809	<LOD	1.09448	0.207399	1.315	6.53361	0.266001	<LOD	1.15365	0.214284	0.21797	0.0274747	192.41	7535.12	10.528	1.54106	0.255829	2284.6	278.988	0.0941943	0.209291	<LOD	<LOD	<LOD	<LOD	<LOD	<LOD	<LOD	<LOD	<LOD	<LOD	<LOD	<LOD	<LOD	<LOD	11.8204
RGPMR	0.477107	0.22155	1.90347	9.47675	57.6473	40.2596	0.618973	42.8135	<LOD	<LOD	110.901	96.2895	911.421	329.415	<LOD	1.07045	<LOD	2.45489	7.80705	1.57382	1.20819	1.8833	<LOD	0.21804	0.00594814	189.842	8214.66	10.6452	2.46303	0	2312.16	287.269	0.013629	0.298977	0.00698506	<LOD	<LOD	<LOD	<LOD	<LOD	<LOD	<LOD	<LOD	<LOD	<LOD	<LOD	<LOD	<LOD	11.5374
RGPMR	0.728622	<LOD	<LOD	<LOD	57.5856	43.1749	0.471178	36.5028	<LOD	<LOD	109.828	96.4153	891.468	308.135	<LOD	1.08926	0.215477	2.81042	6.5578	0.598127	0.421858	<LOD	0.0323123	0.157127	0.0237992	186.145	8264.67	9.80676	1.85814	0.794926	2211.8	276.283	<LOD	0.238744	<LOD	0.00727195	<LOD	0.0244234	<LOD	<LOD	<LOD	<LOD	<LOD	<LOD	<LOD	<LOD	<LOD	<LOD	10.9607
RGPMR	0.200592	<LOD	6.83975	19.4516	63.8836	41.5286	0.501904	44.4822	<LOD	<LOD	108.337	96.4873	892.033	315.809	<LOD	1.0489	0.0268682	2.64275	6.94903	1.05301	0.269921	3.33354	0.00540508	0.14777	0.00601331	201.181	7789.89	11.8408	1.7397	0.572397	2334.66	279.357	<LOD	0.0902916	0.00706154	<LOD	<LOD	<LOD	<LOD	<LOD	<LOD	<LOD	<LOD	<LOD	<LOD	<LOD	<LOD	<LOD	11.7435
RGPMR	<LOD	0.21931	3.09791	5.70598	66.1363	39.6026	0.499613	53.8711	2.24193	0.0062756	110.272	96.5349	883.214	291.257	<LOD	1.0243	<LOD	2.05656	8.31167	0.534878	0	0.950477	0.0937045	0.149806	0.0235044	193.202	7781.37	8.80296	2.11959	0.446315	2263.07	264.452	<LOD	0.0880419	0.00690039	0.00716717	<LOD	0.0241365	<LOD	<LOD	<LOD	<LOD	<LOD	<LOD	<LOD	<LOD	<LOD	<LOD	12.2437
RGPMR	<LOD	0.215599	0.294435	16.9623	54.6181	44.9421	0.463977	31.2743	0.049799	<LOD	117.305	96.4747	829.655	264.85	<LOD	1.11137	<LOD	2.00138	7.29963	0.58174	0.30192	2.00858	<LOD	0.159983	0.0115376	173.971	7934.47	12.4531	1.56735	0.108969	2099.85	253.412	0.0394459	0.114744	<LOD	<LOD	0.00560417	<LOD	<LOD	<LOD	<LOD	<LOD	<LOD	<LOD	<LOD	<LOD	<LOD	<LOD	10.3988
RGPMR	0.185253	0.222596	1.75819	10.4341	60.9034	45.1121	0.475818	71.8274	<LOD	0.0298043	111.858	96.5108	864.365	249.734	<LOD	1.07359	0.165331	1.71168	7.81227	0.499123	1.61724	0.959947	<LOD	0.163892	0.00595191	188.107	7553.41	10.0387	1.73387	<LOD	2173.48	275.965	0.0362337	0.23625	<LOD	<LOD	<LOD	<LOD	<LOD	<LOD	<LOD	<LOD	<LOD	<LOD	<LOD	<LOD	<LOD	<LOD	11.1659
RGPMR	0.0647778	0.45609	0.605044	4.29516	57.8862	44.4182	0.418001	93.6855	10.8872	0.00117506	112.821	96.5786	850.041	275.016	<LOD	1.08644	<LOD	1.76076	5.04932	0.616063	1.32347	3.3251	0.106026	0.220207	0.00668785	194.901	7422.45	10.0598	1.51566	0.376969	2312.67	281.498	<LOD	0.0485597	<LOD	<LOD	<LOD	<LOD	<LOD	<LOD	<LOD	<LOD	<LOD	<LOD	<LOD	<LOD	<LOD	<LOD	10.7028
RGPMR	<LOD	<LOD	4.13117	4.42516	58.2281	42.4337	0.44887	27.9328	10.9424	0.0048278	111.05	96.6005	846.246	263.134	<LOD	1.03929	<LOD	1.83097	6.48438	0.362991	1.0196	0.611659	<LOD	0.162835	0.0282329	187.504	7408.65	9.4468	1.49265	0.0852323	2354.39	296.872	0.094384	0.139456	<LOD	<LOD	<LOD	<LOD	<LOD	<LOD	<LOD	<LOD	<LOD	<LOD	<LOD	<LOD	<LOD	<LOD	11.0141
RGPMR	0.373955	0.520453	2.31922	0.0328876	55.7512	37.003	0.411997	40.2598	1.53927	0.0146203	116.134	96.6027	817.139	274.151	<LOD	1.06246	0.0436299	2.52362	6.61592	0.416027	0.239128	2.04566	<LOD	0.122781	0.0208306	189.685	7403.88	9.80596	1.31957	<LOD	2389.57	296.87	0.0299915	0.273758	<LOD	<LOD	<LOD	0.028578	<LOD	<LOD	<LOD	<LOD	<LOD	<LOD	<LOD	<LOD	<LOD	<LOD	11.5584
RGPMR	0.47317	3.31672	2.67738	<LOD	33.5574	47.8303	0.348029	64.3787	<LOD	<LOD	304.656	95.9969	2082.66	4483.35	<LOD	0.978239	<LOD	2.24862	7.02571	0.333131	0.72571	<LOD	0.0283645	0.21944	0.0931195	982.694	8693.07	12.3966	1.76743	<LOD	55.9146	4.83795	0.0754446	<LOD	<LOD	<LOD	<LOD	<LOD	<LOD	<LOD	<LOD	<LOD	<LOD	<LOD	<LOD	<LOD	<LOD	<LOD	49.0506
RGPMR	0.350297	11.819	0.950852	<LOD	31.6652	51.7237	0.375871	56.6955	<LOD	<LOD	298.072	95.9081	2048.27	4630.12	<LOD	0.998226	<LOD	2.02867	7.60843	0.583025	1.94491	0.0239479	<LOD	0.146625	0.0169104	990.227	8852.83	13.4943	1.86112	0.331623	52.6606	4.63372	<LOD	<LOD	<LOD	<LOD	<LOD	<LOD	<LOD	<LOD	<LOD	<LOD	<LOD	<LOD	<LOD	<LOD	<LOD	<LOD	49.196
RGPMR	0	1.88984	<LOD	11.7164	39.0852	65.4889	0.353249	45.3067	<LOD	<LOD	286.864	96.0633	2011.65	4594.53	<LOD	0.998439	<LOD	2.35041	5.98816	0.213423	1.22208	<LOD	0.357778	0.203769	0.016917	994.989	7980.57	15.2287	1.22819	0.443363	52.505	4.41466	0.0361119	<LOD	0.0148744	<LOD	<LOD	0.0311208	<LOD	<LOD	<LOD	<LOD	<LOD	<LOD	<LOD	<LOD	<LOD	<LOD	47.6481
RGPMR	0.348201	0.470052	1.41353	5.82689	33.7662	62.4581	0.281458	73.1997	<LOD	<LOD	286.622	96.1772	1983.58	4619.77	<LOD	0.954063	0.160891	2.47338	7.13782	0.328268	2.04149	0.685283	0.028191	0.28597	0.0421204	973.6	7993.01	14.6868	1.75424	0.110645	55.2812	4.59579	<LOD	<LOD	0.00987657	<LOD	<LOD	<LOD	<LOD	<LOD	<LOD	<LOD	<LOD	<LOD	<LOD	<LOD	<LOD	<LOD	48.3935
RGPMR	0.276498	1.9265	2.76383	43.4835	30.7203	55.1481	0.322253	71.7036	9.0761	0.00381053	287.683	96.2739	1902.51	4609.91	<LOD	0.81684	0.293567	3.25357	6.86108	0.598091	5.02616	1.59687	0.28134	1.5109	<LOD	988.795	8048.8	14.2931	1.59332	<LOD	54.2221	5.11462	0.00787868	0.730832	0.0151964	<LOD	<LOD	<LOD	<LOD	<LOD	<LOD	<LOD	<LOD	<LOD	<LOD	<LOD	<LOD	<LOD	48.9706
RGPMR	<LOD	0.233938	0.281571	3.01672	29.2261	40.217	0.367625	107.582	<LOD	<LOD	416.728	95.5814	2656.74	2954.64	<LOD	1.08899	<LOD	2.18175	7.11098	0.212823	0.823766	1.1352	0.0170117	0.092018	0.0252072	883.276	10981.7	9.88977	2.44473	0.886965	76.8137	3.33258	0.0582734	0.0398556	0.0147788	<LOD	<LOD	<LOD	<LOD	<LOD	<LOD	<LOD	<LOD	<LOD	<LOD	<LOD	<LOD	<LOD	46.7138
RGPMR	0.29864	<LOD	2.44075	11.1442	34.414	40.7308	0.339489	80.7104	6.06048	<LOD	409.869	95.6458	2621.46	2980.36	<LOD	1.09148	<LOD	3.26131	5.479	0.0796784	0.301098	<LOD	0.10319	0.203239	0.0424906	880.421	10868.8	13.314	2.4486	0.224784	78.4158	3.34875	0.0160841	<LOD	0.0298966	<LOD	<LOD	<LOD	<LOD	<LOD	<LOD	<LOD	<LOD	<LOD	<LOD	<LOD	<LOD	<LOD	45.5114
RGPMR	0.0627696	0.485225	5.88317	0.724567	37.1794	39.1391	0.436557	65.5782	<LOD	<LOD	398.357	95.5729	2628.71	3067.76	<LOD	1.07399	0.172943	2.38878	5.75151	0.317826	2.68512	<LOD	<LOD	0.189714	0.0261961	876.575	10715.3	11.7404	2.38735	<LOD	79.3757	2.94604	0.0545249	<LOD	<LOD	<LOD	<LOD	<LOD	<LOD	<LOD	<LOD	<LOD	<LOD	<LOD	<LOD	<LOD	<LOD	<LOD	44.5663
RGPMR	0.0527265	0.478979	1.68118	10.6753	33.2123	39.4787	0.293531	78.2654	<LOD	<LOD	396.677	95.6694	2605.08	3232.22	<LOD	1.10359	<LOD	2.74117	5.92027	0.314463	<LOD	0.582502	0.148042	0.244177	0.043143	893.796	10833.5	12.3194	2.41277	0.343928	75.1659	3.4854	0.0112046	<LOD	<LOD	<LOD	<LOD	<LOD	<LOD	<LOD	<LOD	<LOD	<LOD	<LOD	<LOD	<LOD	<LOD	<LOD	45.5702
RGPMR	<LOD	<LOD	1.66163	<LOD	34.0647	41.7885	0.397102	91.4442	6.40011	<LOD	396.626	95.5826	2577.41	3194.93	<LOD	1.06342	<LOD	1.66255	6.7819	0.226495	1.34162	0.460995	0.0284892	0.118479	0.00853448	884.975	10969	13.7684	2.38528	<LOD	72.4274	3.84101	<LOD	0.121592	0.00500516	<LOD	<LOD	<LOD	<LOD	<LOD	<LOD	<LOD	<LOD	<LOD	<LOD	<LOD	<LOD	<LOD	46.7558
RGPMR	0.0632249	0.223909	1.49443	<LOD	30.4714	59.0484	0.302725	91.7313	<LOD	<LOD	162.489	96.314	562.421	373.728	<LOD	1.28967	0.150304	2.52895	5.02721	0.634284	1.4108	0.792779	0.00587152	0.132338	<LOD	258.442	9348.44	7.38048	1.55082	<LOD	2366.95	167.598	<LOD	0	<LOD	<LOD	<LOD	<LOD	<LOD	<LOD	<LOD	<LOD	<LOD	<LOD	<LOD	<LOD	<LOD	<LOD	15.4907
RGPMR	0.113183	2.24276	2.88355	8.89436	32.8455	49.8195	0.337428	68.0731	<LOD	<LOD	162.664	96.3329	548.247	363.597	<LOD	1.24768	0.379835	2.46578	6.29098	0.475742	0	1.17296	0.103354	0.247908	<LOD	256.322	9273.44	7.34133	1.91928	0.109859	2489.91	162.192	0.0705734	0.159609	<LOD	<LOD	<LOD	<LOD	<LOD	<LOD	<LOD	<LOD	<LOD	<LOD	<LOD	<LOD	<LOD	<LOD	15.039
RGPMR	<LOD	0.224505	2.36121	6.32721	35.2335	44.1036	0.300313	85.3872	<LOD	<LOD	162.853	96.3828	541.097	353.619	<LOD	1.25408	0.460599	1.50962	6.43548	0.479096	0.761973	<LOD	0.0838488	0.164808	0.0167904	250.664	9044.86	9.44375	1.82149	<LOD	2596.92	163.141	0.0980013	<LOD	<LOD	0.00993024	<LOD	<LOD	<LOD	<LOD	<LOD	<LOD	<LOD	<LOD	<LOD	<LOD	<LOD	<LOD	15.2027
RGPMR	<LOD	<LOD	4.79767	4.61765	31.8503	40.7683	0.316005	85.7101	2.43346	0.0667205	153.7	96.3576	527.241	331.358	<LOD	1.21583	0.410355	1.92505	5.6533	0.399036	0.223962	0.520932	<LOD	0.193084	0.00677236	242.795	8882.09	8.25923	1.8209	0.088745	2690.98	172.069	<LOD	<LOD	<LOD	<LOD	0.216026	0.0293882	<LOD	<LOD	<LOD	<LOD	<LOD	<LOD	<LOD	<LOD	<LOD	<LOD	14.8855
RGPMR	0.139271	<LOD	2.26655	5.69693	30.808	50.1567	0.324777	43.7533	<LOD	<LOD	159.666	96.2714	522.834	338.822	<LOD	1.37477	0.724509	2.03809	3.32956	0.403654	0.470578	0.330428	<LOD	0.158855	0.00808174	251.517	8988.23	8.43075	1.75183	0.194141	2508.85	154.455	0.0538391	<LOD	<LOD	1.77372	<LOD	<LOD	<LOD	<LOD	<LOD	<LOD	<LOD	<LOD	<LOD	<LOD	<LOD	<LOD	14.5537
RGPMR	<LOD	2.01887	2.653	13.4499	26.8593	61.9948	0.323847	147.585	<LOD	0.00535543	431.659	96.5042	879.765	1068.88	<LOD	1.20857	0.574929	1.76492	4.98094	0.471092	<LOD	0.14728	0.0677436	0.23045	0.0240356	333.263	8887.98	4.42608	2.21049	0.332226	322.766	20.8767	0.0555312	0.121733	<LOD	0.00501423	<LOD	<LOD	<LOD	<LOD	<LOD	<LOD	<LOD	<LOD	<LOD	<LOD	<LOD	<LOD	19.0171
RGPMR	<LOD	17.778	1.58458	0.405954	30.9462	88.3846	0.347623	37.6871	<LOD	0.0413797	420.919	95.8152	977.746	1179.77	<LOD	1.35314	<LOD	1.7626	3.83837	0.871461	1.119	0.0641985	0.0685355	0.256366	<LOD	353.181	11626	5.91545	2.22931	0.437736	402.053	18.7366	<LOD	0.0399527	<LOD	0.0148282	<LOD	<LOD	<LOD	<LOD	<LOD	<LOD	<LOD	<LOD	<LOD	<LOD	<LOD	<LOD	21.4391
RGPMR	0.00940842	4.87618	2.9835	<LOD	32.738	65.7866	0.349226	53.012	<LOD	0.0188138	434.223	95.7321	1078	1127.77	<LOD	1.38553	0.208573	2.30885	5.48725	0.669291	1.4255	1.21304	<LOD	0.0686786	<LOD	341.691	12456.9	3.4959	2.55976	0.308909	316.351	18.8188	0.0300471	0.0396049	0.00963316	<LOD	<LOD	0.030144	<LOD	<LOD	<LOD	<LOD	<LOD	<LOD	<LOD	<LOD	<LOD	<LOD	19.9105
RGPMR	<LOD	0.654747	5.27344	2.43361	30.2647	51.6684	0.370536	79.0995	0.340073	0.016409	360.747	96.3482	1003.6	1239.46	<LOD	1.17922	<LOD	1.19009	4.84298	0.268677	0.370075	1.05262	0.0703075	0.132963	0.0325322	627.517	9500.23	8.20491	1.86242	<LOD	268.863	9.29006	0.0437214	<LOD	0.00944801	0.0144195	<LOD	<LOD	<LOD	<LOD	<LOD	<LOD	<LOD	<LOD	<LOD	<LOD	<LOD	<LOD	30.8504
RGPMR	<LOD	20.1874	3.6017	<LOD	31.7773	60.8182	0.321788	52.0221	<LOD	0.0151115	377.832	96.1602	1139.31	1344.03	<LOD	1.27607	<LOD	2.46847	6.72797	0.773168	0.352639	0.257875	<LOD	0.179867	0.00823049	633.19	10162.6	6.61935	2.17948	0.542194	254.951	8.7831	0.0249677	<LOD	<LOD	<LOD	<LOD	<LOD	<LOD	<LOD	<LOD	<LOD	<LOD	<LOD	<LOD	<LOD	<LOD	<LOD	32.2122
RGPMR	0.248162	0.471386	7.13152	<LOD	34.8821	54.1129	0.433756	54.0113	<LOD	0.00568928	147.024	96.2065	440.491	319.65	<LOD	1.36762	0.0437036	2.17709	5.1155	0.437713	0.251674	0.896001	0.113289	0.29727	0.0261184	226.659	8433.23	8.45178	1.59004	<LOD	2800.07	196.806	<LOD	<LOD	0.0151846	0.00513993	<LOD	<LOD	<LOD	<LOD	<LOD	<LOD	<LOD	<LOD	<LOD	<LOD	<LOD	<LOD	13.9264
RGPMR	0.464162	0.477704	0	16.7869	34.9879	53.1461	0.384233	81.9943	<LOD	<LOD	145.096	96.239	437.561	326.497	<LOD	1.40184	<LOD	2.18267	6.13984	0.294146	1.54802	<LOD	0.0581613	0.269288	<LOD	230.637	8402.8	8.08708	1.48499	<LOD	2838.69	197.257	0.0257881	<LOD	0	<LOD	<LOD	0.0319785	<LOD	<LOD	<LOD	<LOD	<LOD	<LOD	<LOD	<LOD	<LOD	<LOD	13.5711
RGPMR	<LOD	0.234185	1.19021	<LOD	25.4175	53.9176	0.37977	82.3412	3.59139	0.0285662	150.704	96.2378	435.888	323.354	<LOD	1.36724	0.955116	2.51291	6.0114	0.158112	0.117841	<LOD	<LOD	0.0819014	0.00857525	236.686	8447.35	8.97347	1.22598	<LOD	2882.19	200.93	<LOD	0.081185	0.0149702	<LOD	<LOD	<LOD	<LOD	<LOD	<LOD	<LOD	<LOD	<LOD	<LOD	<LOD	<LOD	<LOD	13.7694
RGPMR	0.124924	0.711724	<LOD	0.603698	28.2714	53.7481	0.285655	87.1632	<LOD	0.00304005	146.659	96.2823	437.377	335.799	<LOD	1.42346	<LOD	2.0163	4.65044	0.255464	2.9982	<LOD	<LOD	0.198407	0.00864957	234.286	8501.95	8.97601	1.7791	0.114852	2942.91	201.693	0.0371149	<LOD	<LOD	<LOD	<LOD	<LOD	<LOD	<LOD	<LOD	<LOD	<LOD	<LOD	<LOD	<LOD	<LOD	<LOD	13.8062
RGPMR	<LOD	1.19877	2.7766	<LOD	31.9752	56.5318	0.373929	33.3923	<LOD	<LOD	149.512	96.2402	435.186	334.127	<LOD	1.39559	0.668068	1.87987	5.77622	0.40684	<LOD	<LOD	0.0212658	0.190029	0.00870352	232.997	8517.11	8.68461	1.57085	0	2899.41	198.017	0.0137033	<LOD	0.0101387	<LOD	<LOD	<LOD	<LOD	<LOD	<LOD	<LOD	<LOD	<LOD	<LOD	<LOD	<LOD	<LOD	14.2387
RGPMR	<LOD	<LOD	5.41848	<LOD	37.409	56.0058	0.300844	48.7628	<LOD	<LOD	154.763	96.4011	438.496	373.087	<LOD	1.26213	0.616352	2.48373	5.94649	0.61002	2.42194	<LOD	<LOD	0.340415	0.0365409	240.26	8706.14	8.26077	1.59713	0.364942	2865.03	185.741	<LOD	<LOD	0.00532169	<LOD	<LOD	<LOD	<LOD	<LOD	<LOD	<LOD	<LOD	<LOD	<LOD	<LOD	<LOD	<LOD	14.1696
RGPMR	<LOD	<LOD	5.58649	16.0602	31.3097	50.7397	0.279457	91.3683	<LOD	0.0655132	145.697	96.4926	432.85	355.606	<LOD	1.15932	<LOD	2.7605	7.32929	0.239944	0.223146	0.307351	<LOD	0.291153	0.00916103	222.095	8574.31	7.60541	2.48037	0.365601	2781.22	182.655	0.0678224	0.0863353	0.0160054	0.0215137	<LOD	<LOD	<LOD	<LOD	<LOD	<LOD	<LOD	<LOD	<LOD	<LOD	<LOD	<LOD	14.0197
RGPMR	0.256909	0.257292	0.866401	<LOD	33.3609	46.8271	0.339915	67.928	<LOD	<LOD	152.821	96.3558	436.655	350.699	<LOD	1.26616	<LOD	3.33392	6.46402	0.398938	4.22547	0.811056	0.0326257	0.210834	0.0183477	230.243	8802.76	8.8396	2.22496	<LOD	2825.42	182.407	<LOD	<LOD	0.00534104	0.0053779	<LOD	<LOD	<LOD	<LOD	<LOD	<LOD	<LOD	<LOD	<LOD	<LOD	<LOD	<LOD	14.2242
RGPMR	0.0590731	0.244979	1.84237	<LOD	33.4617	59.5092	0.259251	65.2967	12.0157	0.00942915	153.193	96.3219	433.567	359.199	<LOD	1.39005	0.18299	2.91365	6.11987	0.465856	2.87484	0.315218	<LOD	0.200001	<LOD	252.662	8744.41	9.62529	1.72547	0.34634	2735.6	168.337	0.0416333	<LOD	0.00506135	<LOD	<LOD	<LOD	<LOD	<LOD	<LOD	<LOD	<LOD	<LOD	<LOD	<LOD	<LOD	<LOD	15.1519
RGPMR	<LOD	0.243679	7.25887	2.47984	30.7484	48.4075	0.32012	61.5364	<LOD	<LOD	162.237	96.3526	428.988	350.203	<LOD	1.27184	0.285535	1.81547	4.98507	0.601375	0.578383	0.065907	0.1939	0.152198	0.0172235	245.839	9020.96	9.07235	1.83021	0.228429	2759.64	163.251	0.0152366	0.0406113	0.0100218	0.0151003	<LOD	<LOD	<LOD	<LOD	<LOD	<LOD	<LOD	<LOD	<LOD	<LOD	<LOD	<LOD	14.5648
RGPMR	<LOD	<LOD	<LOD	10.6501	30.6399	54.1709	0.218267	82.2648	2.58873	<LOD	137.091	96.538	568.054	320.291	<LOD	1.32711	<LOD	2.92249	7.69149	0.62473	1.02775	<LOD	<LOD	0.235077	0.00931214	196.803	7724.31	9.12268	1.32461	<LOD	2497.16	274.523	0.0228268	0.0878513	<LOD	<LOD	<LOD	<LOD	<LOD	<LOD	<LOD	<LOD	<LOD	<LOD	<LOD	<LOD	<LOD	<LOD	11.8057
RGPMR	<LOD	0.540125	5.1201	4.37657	28.71	59.7385	0.314205	64.6662	<LOD	0.0355019	140.236	96.4185	548.003	324.621	<LOD	1.3406	<LOD	3.34751	5.85428	0.667108	<LOD	1.62952	0.0820452	0.134362	0.00946171	206.65	7811.95	8.84924	1.53213	<LOD	2500.63	223.058	<LOD	0.0892852	0.0055023	0.00551402	<LOD	<LOD	<LOD	<LOD	<LOD	<LOD	<LOD	<LOD	<LOD	<LOD	<LOD	<LOD	12.9488
RGPMR	0.185735	<LOD	2.56023	<LOD	32.5121	61.2614	0.2608	67.9379	3.05852	0.0304111	141.774	96.4376	543.075	315.046	<LOD	1.37492	0.213482	2.86855	6.328	0.474007	3.55643	0.542228	0.166831	0.197787	<LOD	218.672	7865.99	11.0047	1.71231	0.124346	2470.21	216.287	0.0607755	0.177519	<LOD	<LOD	<LOD	<LOD	<LOD	<LOD	<LOD	<LOD	<LOD	<LOD	<LOD	<LOD	<LOD	<LOD	12.902
RGPMR	<LOD	<LOD	2.79634	<LOD	36.2405	65.7395	0.322444	26.8264	<LOD	0.017323	138.799	96.3566	528.204	302.991	<LOD	1.39301	0.07725	1.41515	7.07655	0.589309	0.369289	1.07122	0.103958	0.323494	0.0292014	217.085	7884.07	10.3907	1.69163	<LOD	2646.18	226.749	<LOD	0.137849	0.00565733	<LOD	<LOD	<LOD	<LOD	<LOD	<LOD	<LOD	<LOD	<LOD	<LOD	<LOD	<LOD	<LOD	12.5046
RGPMR	0.494163	<LOD	5.01608	2.08423	27.4958	63.2197	0.359101	53.6258	1.31989	0.0565551	142.934	96.3351	522.031	314.348	<LOD	1.35032	0.722715	1.91688	4.32866	0.277776	1.41705	0.828716	<LOD	0.267439	0.0280109	216.675	7881.12	8.97931	1.54506	0.369672	2531.42	220.669	0.0119816	0.0369105	0.0271258	<LOD	<LOD	<LOD	<LOD	<LOD	<LOD	<LOD	<LOD	<LOD	<LOD	<LOD	<LOD	<LOD	13.2365
RGPMR	<LOD	<LOD	2.1396	7.96273	25.5283	52.0472	0.219215	55.0477	1.62286	0.0462032	141.783	96.5611	563.211	333.366	<LOD	1.22003	0.418207	2.55595	5.09116	0.429005	2.97181	0.896267	0.0440793	0.139307	<LOD	209.292	7672.59	9.21949	2.00237	0.518105	2529.43	284.757	<LOD	0.231241	<LOD	<LOD	<LOD	<LOD	<LOD	<LOD	<LOD	<LOD	<LOD	<LOD	<LOD	<LOD	<LOD	<LOD	12.4479
RGPMR	<LOD	0.286322	3.71851	5.09081	30.7017	60.9036	0.260207	41.0701	4.50674	0.0411229	139.338	96.6622	553.488	323.485	<LOD	1.22207	<LOD	3.5532	5.31116	0.560775	1.16996	0.379435	0.254822	0.173338	0.0196254	224.598	6824.02	9.01449	1.53229	<LOD	2556.68	273.822	0.0470094	0.0462197	0.00568393	<LOD	<LOD	<LOD	<LOD	<LOD	<LOD	<LOD	<LOD	<LOD	<LOD	<LOD	<LOD	<LOD	12.2718
RGPMR	0.176404	0.286233	7.27161	28.2178	24.8137	51.3535	0.412911	53.0706	<LOD	0.0293909	137.275	96.3861	569.486	313.638	<LOD	1.34454	<LOD	2.43018	6.52993	0.317816	1.51749	<LOD	<LOD	0.210243	0.0391352	222.647	6858.16	10.8716	0.947337	<LOD	2595.75	273.911	<LOD	<LOD	0.0056591	<LOD	<LOD	<LOD	<LOD	<LOD	<LOD	<LOD	<LOD	<LOD	<LOD	<LOD	<LOD	<LOD	13.0912
RGPMR	0.552608	<LOD	7.19524	1.11097	27.8637	54.6989	0.282508	81.9317	0.985646	0.020739	136.418	96.4265	497.095	325.783	<LOD	1.30267	1.12386	3.02816	5.18644	0.465747	1.95603	<LOD	<LOD	0.176416	<LOD	211.564	7659.55	12.0575	2.04842	<LOD	2618.11	277.066	0.032252	0.0471424	0.00579677	0.00580951	<LOD	<LOD	<LOD	<LOD	<LOD	<LOD	<LOD	<LOD	<LOD	<LOD	<LOD	<LOD	12.7276
RGPMR	<LOD	0.281112	<LOD	0.5035	27.6144	96.5325	0.206737	65.8586	<LOD	0.000787729	144.327	96.5949	486.112	337.411	<LOD	1.27315	<LOD	3.44383	17.2434	0.50705	4.24063	0.139859	<LOD	0.186831	0.0191158	212.979	7540.73	10.4961	1.34592	0.488231	2586.38	274.014	0.024189	0.0823664	0.00551241	<LOD	<LOD	<LOD	<LOD	<LOD	<LOD	<LOD	<LOD	<LOD	<LOD	<LOD	<LOD	<LOD	12.0199
Ave.	0.195392	1.63154	2.51657	7.12442	38.7607	48.7036	0.336487	61.3727	4.01896	0.0202964	184.821	96.5798	973.916	1108.02	#DIV/0!	1.10854	0.291266	2.4207	6.07364	0.436244	1.15899	0.809549	0.085847	0.201503	0.0189811	356.986	7770.72	9.26548	1.7176	0.28622	1594.77	145.528	0.0376274	0.112922	0.0100977	0.135427	0.0783766	0.0476444	#DIV/0!	#DIV/0!	#DIV/0!	#DIV/0!	#DIV/0!	#DIV/0!	#DIV/0!	#DIV/0!	#DIV/0!	#DIV/0!	19.5447
sd	0.177602	3.78476	2.01123	7.16522	12.311	13.0467	0.0951605	22.7539	3.87026	0.0189767	100.749	0.633624	672.961	1469.9	#DIV/0!	0.204478	0.255612	0.868317	2.07974	0.219817	1.08351	0.739302	0.0806197	0.16361	0.0146332	275.328	1860.6	2.73821	0.447935	0.200244	1090.41	110.197	0.0235823	0.118313	0.0066256	0.454408	0.0973859	0.0606655	#DIV/0!	#DIV/0!	#DIV/0!	#DIV/0!	#DIV/0!	#DIV/0!	#DIV/0!	#DIV/0!	#DIV/0!	#DIV/0!	13.2551
n	41	55	64	59	74	74	74	74	32	32	74	74	74	74	0	74	41	74	74	74	69	49	39	74	62	74	74	74	74	52	74	74	44	46	27	14	3	10	0	0	0	0	0	0	0	0	0	0	74
PAK122	31.6157	0.474237	2.94644	45.2198	106.67	244.366	0.398763	47.764	1.06161	0.0128364	0.262852	57.4125	1.08589	<LOD	14.0738	23.4116	1.48547	3.24617	25733.6	1.70198	3.53817	1.97968	0.197436	1.46087	112.27	3.06659	2422.77	23.9835	0.516733	2.58605	1.09424	<LOD	0.0461652	374.659	10.4776	31.3494	11.127	66.8615	23.1926	4.80383	19.4262	3.08176	19.0374	3.50554	9.77943	1.15301	6.05127	0.567966	0.137434
PAK122	23.5584	1.95402	3.3831	33.1906	141.374	546.478	0.51132	46.4924	<LOD	0.00115943	0.155903	56.4603	0.805121	<LOD	12.9359	24.2219	1.5589	4.08605	34405.5	1.82893	3.18196	3.85973	0.451873	1.54977	91.0821	2.57348	2329.73	29.1664	0.48653	3.51611	1.46788	0.0579688	0.0237963	255.005	6.11872	40.1512	6.76351	37.8502	15.5519	3.49859	14.7218	2.30397	13.4743	2.64303	7.67306	0.938167	4.90494	0.549399	0.134149
PAK122	41.9848	<LOD	<LOD	77.7956	161.308	3.12737	0.339779	46.3	<LOD	<LOD	0.0941185	56.9146	0.0743196	<LOD	19.6651	19.4597	2.07686	1.13313	21266.5	1.22643	1.29223	0.885302	<LOD	0.0549215	1.17015	2.77632	2460.28	1.512	0.584316	<LOD	1.37133	0.135131	<LOD	8.92899	0.0870873	0.762304	0.149392	0.799509	0.316001	0.0459387	0.141705	0.0447547	0.245292	0.0454494	0.0993243	0.00772386	0.30282	0.0725678	0.0982168
PAK122	38.2394	0.0892171	0.983743	75.2888	150.2	0.204466	0.31999	32.3328	0.125249	<LOD	<LOD	56.4654	<LOD	<LOD	18.9187	21.3557	1.51054	1.17791	15584.6	0.621173	2.64609	0.558933	0.0259171	0.108402	0.125291	2.08037	2420	0.132901	0.494048	0.278791	0.619663	0.0514997	<LOD	0.60929	0.00588285	0.0242502	0.0146616	0.0203961	0.0330691	<LOD	<LOD	<LOD	0.00854935	<LOD	0.00649737	0.0242438	0.189429	0.108784	0.0793887
PAK122	31.3085	0.15668	0.266208	62.2471	142.221	1.6619	0.303227	28.486	<LOD	<LOD	0.0998603	56.8439	0.120774	1.0075	19.8864	19.2655	1.71589	1.13963	22690.3	1.16773	2.32652	0.2291	0.0734561	0.0212206	0.536582	2.49256	1970.53	0.643134	0.469452	0.635175	1.31609	0.0444393	0.0419784	3.1503	0.0565237	0.183277	0.0610335	0.274071	0.127027	0.0092209	0.0893955	0.0163406	0.0820323	0.0103707	0.0561644	<LOD	0.222155	0.12024	0.152612
PAK122	31.3498	<LOD	3.26244	67.1041	141.881	1.25517	0.301858	28.6914	4.54987	<LOD	<LOD	56.3365	0.0282813	0.509144	19.7102	20.1935	1.50389	1.12211	20439.7	1.46822	2.13539	<LOD	<LOD	0.0117722	0.364001	3.09426	2025.51	0.769668	0.289797	<LOD	1.31645	0.0773792	0.0059957	4.18635	0.0615631	0.212912	0.0464774	0.271085	0.0628537	0.0116268	0.0736919	0.0202047	0.0730017	0.00615486	0.0308833	<LOD	0.208169	0.0741279	0.0692825
PAK122	31.9132	<LOD	2.29176	62.489	139.947	1.64668	0.324346	61.4986	<LOD	<LOD	<LOD	56.9723	0.0190609	<LOD	18.5611	20.7312	1.32651	0.688046	19852	0.896181	2.67475	0.0670993	<LOD	0.0944142	0.177482	3.34535	2105.62	0.428714	0.357802	0.092283	1.1513	0.08356	<LOD	1.29596	0.0306432	0.111577	0.0346953	0.115537	0.0312693	0.0181345	0.0293168	0.0100473	0.0322558	0.0061211	0.0122933	<LOD	0.0805066	0.0718177	0.0940857
PAK122	28.8764	<LOD	3.61435	61.2772	125.698	0.814319	0.28656	48.1175	1.14185	<LOD	0.00775764	56.5491	0.0924382	<LOD	19.6062	19.3285	1.4371	1.01007	26779.7	1.34359	1.81593	0.278828	<LOD	0.093789	0.136137	2.95505	2132.38	<LOD	0.605922	0.724012	1.15121	0.0687546	0.0214468	0.296116	0.00538153	0.0165614	<LOD	<LOD	<LOD	<LOD	0.0282906	<LOD	0.0155569	<LOD	<LOD	<LOD	0.122069	0.0674609	0.0484855
PAK122	30.5673	0.238861	2.35848	60.8613	128.376	75.936	0.26384	21.8994	2.12931	<LOD	<LOD	55.6291	0.546328	2.06962	18.3696	20.2473	1.99031	1.77562	33910.5	1.32012	1.79807	1.1539	<LOD	0.273491	21.7175	2.90388	2179.48	32.7667	0.528727	1.76631	1.58862	0.0872334	0.0345016	141.922	2.49986	13.8488	2.70228	16.6055	6.12204	1.25117	5.24874	0.862613	4.18223	0.808141	2.17343	0.255303	1.18918	0.153533	0.0981694
PAK122	25.2828	0.296248	4.51614	68.295	55.5027	62.8836	0.305163	84.1217	<LOD	0.027131	<LOD	53.7012	0.495924	<LOD	24.1448	13.3536	1.7912	2.01643	59367.9	1.3772	2.53194	<LOD	0.0409938	0.339249	22.8031	1.85727	2094.48	31.8408	0.276222	2.16525	1.45436	<LOD	0.0500351	146.987	2.28405	9.05438	2.73411	16.6545	6.11462	1.21629	6.02771	0.867277	4.79035	0.895738	2.37634	0.306321	1.08842	0.128643	0.135009
PAK122	25.4115	0.0468958	18.5236	54.0888	98.6373	34.4133	0.85892	42.4989	<LOD	<LOD	<LOD	54.919	0.220165	<LOD	19.0748	22.3377	1.45313	0.64146	13653.5	<LOD	0.18331	0.115645	<LOD	0.185041	12.0636	2.10789	2630.89	2.3698	0.185809	0.349537	10.5367	<LOD	<LOD	24.9514	1.27121	9.37521	1.23792	6.97085	2.29732	0.471208	1.5416	0.275406	1.52408	0.307235	0.896438	0.0893646	0.729415	0.0658398	0.0775576
PAK122	27.6704	<LOD	20.6342	72.1961	92.037	0.811044	0.867349	71.6272	0.845481	<LOD	0.0300856	55.6594	0.0383356	<LOD	18.9357	21.4114	1.52984	0.438606	16606.3	<LOD	0.542265	<LOD	<LOD	0.0699058	0.221709	2.05645	2800.64	0.12168	0.25781	0.136648	10.9087	0.108882	<LOD	0.243605	0.0155281	0.121836	0.0168758	0.0846309	0.0216165	0.0184739	0.0460121	0.0048571	0.0355976	0.00395346	0.0186809	0.00610859	0.133871	0.0416913	0.0822259
PAK122	26.7753	<LOD	23.9678	71.3382	94.4973	1.91548	0.87567	56.3261	<LOD	<LOD	0.00745388	55.2306	0.0728468	0.132506	19.7475	21.7091	1.46101	0.590182	11048.4	<LOD	0.823319	0.150396	<LOD	0.0937755	0.575115	1.80871	2765.31	0.242475	0.190381	0.330431	9.98743	<LOD	<LOD	1.47077	0.0479244	0.493623	0.0547287	0.343817	0.0605336	0.0138053	0.0886198	0.019636	0.0914804	0.0238087	0.060089	0.0196061	0.0545665	0.0585284	0.085721
PAK122	20.945	<LOD	21.7378	55.3336	83.8627	1.03478	0.871156	50.8675	6.83559	0.00540579	0.112067	54.8939	0.057811	0.145825	18.7988	23.5548	1.18583	0.439163	6810	<LOD	0.396079	0.234721	0.019948	0.105115	0.111445	1.88024	2246	0.0337196	0.193903	0	10.3587	<LOD	<LOD	0.0180658	<LOD	0.255214	<LOD	0.0937809	0.0143659	0.00612026	0.0656318	<LOD	0.0197747	0.00691604	<LOD	0.00676613	0.0988852	0.0417003	0.0527945
PAK122	18.2187	<LOD	21.3473	49.4952	84.7304	4.29456	0.898281	54.2582	<LOD	0.0137251	0.0111764	54.8266	0.128502	0.102631	19.6652	22.538	1.16343	0.566656	8385.58	<LOD	0.856602	0.0590107	<LOD	0.131514	1.08052	1.89897	2240.54	1.54855	0.238648	0.205814	10.808	0.0132329	<LOD	5.26635	0.12625	1.73675	0.124584	0.739387	0.235038	0.0484747	0.22145	0.0374865	0.231738	0.0245264	0.0914045	0.0162825	0.155927	0.04322	0.0820602
PAK122	21.7295	0.21663	18.2825	42.6666	83.8651	198.643	0.855903	55.7934	<LOD	0.00280524	0.143349	56.1458	1.65201	1.16001	12.9435	25.8277	1.58751	4.48163	17307	<LOD	1.63223	1.68484	0.0605583	0.787404	72.9772	2.40389	2725.36	83.5078	0.212795	1.43697	10.5157	0.131451	0.0265829	335.787	7.69211	58.7372	8.55665	46.0087	17.1713	3.20086	14.1269	2.29986	12.4789	2.28315	5.94775	0.728341	3.49393	0.296593	0.107391
PAK122	21.0299	0.0492354	22.7112	66.4924	62.2173	1.66645	0.786803	77.172	<LOD	0.00716333	<LOD	56.2339	0.0434537	<LOD	18.2152	21.6786	1.56061	0.512318	16239.7	<LOD	0.89163	0.157396	0.0096613	0.097011	0.269464	1.73544	2769.54	0.121494	0.276744	<LOD	10.7846	0.111904	0.0175301	0.31697	0.0127238	0.0924883	0.0210591	0.13981	0.0362248	0.00819241	0.0331822	0.0043442	0.0240476	0.0120097	0.0210617	0.00681064	0.111904	0.0477929	0.0772993
PAK122	45.8558	<LOD	5.57904	104.119	151.628	0.525084	0.203466	48.1453	<LOD	<LOD	0.339871	55.7721	<LOD	<LOD	21.3082	18.785	2.11801	1.25612	24242	0.877352	0.100411	<LOD	<LOD	0.13707	0.0654627	3.20544	2243.13	0.0745953	0.564921	0.399314	1.40365	<LOD	<LOD	<LOD	<LOD	<LOD	<LOD	<LOD	<LOD	<LOD	<LOD	<LOD	0.0566641	0.0101387	0.0870238	0.0313849	0.716358	0.111796	0.0746319
PAK122	42.1351	<LOD	4.41273	112.442	139.038	1.31944	0.284865	79.9614	6.89398	<LOD	0.164365	55.9034	<LOD	1.86191	19.9356	21.2194	1.47608	1.74491	13258.9	0.850338	0.769604	<LOD	<LOD	0.0635921	0.030149	2.31142	2370.3	0.0773508	0.516457	<LOD	1.58893	0.172447	0.0359454	0.0364485	<LOD	<LOD	0.0740796	<LOD	0.0478903	<LOD	<LOD	<LOD	0.0117331	0.0104967	0.0737582	0.0525235	0.667158	0.14351	0.0808465
PAK122	47.8994	0.146856	2.41672	111.552	144.697	0.910455	0.250635	14.2603	4.56848	<LOD	0.117929	55.4534	0.0760168	2.5341	20.0485	21.4996	0.898202	1.44083	13703.7	0.870663	1.16101	0.54158	<LOD	0.0950574	0.0746803	2.9047	2657.02	0.0766915	0.366151	0.509878	0.912809	0.0294929	0.00584443	<LOD	<LOD	0.0260305	<LOD	<LOD	<LOD	<LOD	0.0634646	<LOD	0	0.0051955	0.0892923	0.049551	0.827008	0.132176	0.119989
PAK122	41.8842	<LOD	1.58338	98.2162	139.188	0.205974	0.228631	16.9071	<LOD	0.00336546	<LOD	54.7584	0.0795233	0.226798	20.9139	20.9204	1.03562	2.2568	17590	1.28202	0.62739	0.241439	0.0316825	0.168274	0.0363623	2.37489	2413.9	<LOD	0.423983	0.153792	1.92742	<LOD	0.0702841	0.0351458	0.0127764	<LOD	<LOD	<LOD	<LOD	<LOD	0.011373	<LOD	0.033902	0.0227471	0.150145	0.0410055	0.600873	0.114111	0.124464
PAK122	40.1803	<LOD	4.60692	101.271	143.48	1.10062	0.300143	47.7609	2.55725	0.0323649	<LOD	54.173	0.200569	1.27498	21.3575	19.8124	1.38794	1.53464	27244	1.25046	1.84592	0.721028	<LOD	0.124281	0.0352467	2.15161	2206.84	<LOD	0.478649	<LOD	1.24094	0.0822059	<LOD	<LOD	<LOD	<LOD	<LOD	<LOD	<LOD	0.00575122	0.0398558	<LOD	0.0109442	<LOD	0.12252	0.044413	0.554506	0.120237	0.0903592
PAK122	26.7437	2.11181	6.09135	<LOD	115.246	13.6627	0.103941	41.5276	0	<LOD	0.0288991	51.4384	0.518955	1.4765	24.1827	19.5862	1.42283	3.32881	30326.7	0.634541	1.75947	<LOD	0.00986707	0.142194	8.46272	1.14215	1677.17	13.3016	0.412926	0.633427	0.355626	0.028376	<LOD	54.2506	0.793632	1.50539	1.00309	5.66511	2.17611	0.456535	1.72501	0.269138	1.60061	0.258736	0.62433	0.0861956	0.58312	0.120028	0.087968
PAK122	20.0848	0.973263	10.1727	<LOD	92.1828	36.7235	0.328636	71.6695	3.67126	<LOD	<LOD	52.9878	1.22623	4.51779	22.5719	17.9113	1.40899	3.21668	41977.6	1.20425	1.04496	0.672962	0.0276642	0.183939	9.3935	1.64579	1617.78	54.9247	0.731824	0.231895	1.45115	0.0728399	0.0106263	95.1067	1.15466	9.11636	1.63908	7.89367	3.02751	0.567492	2.47296	0.410714	1.93675	0.422764	1.0135	0.10205	0.738753	0.0939401	0.041142
PAK122	22.9277	<LOD	<LOD	<LOD	95.9632	13.9001	0.242398	24.6814	<LOD	0.0568299	0.110724	53.3303	<LOD	8.40327	23.2294	16.7212	1.32718	2.23497	45267.3	0.833925	0.453341	0.237631	0.0652114	0.162131	5.90771	1.30429	1541.04	14.6283	0.575464	<LOD	1.96919	<LOD	<LOD	35.6196	0.771458	3.58641	0.875047	3.86379	1.53781	0.3266	1.65042	0.265759	1.15552	0.23328	0.585045	0.0554179	0.398567	0.0648443	0.0894907
PAK122	10.2699	0.24378	<LOD	<LOD	46.3521	157.587	0.268846	49.4783	2.02769	0.0232819	0.0300565	53.5331	3.89107	2.08767	16.9975	22.9426	1.19169	4.7452	36257	1.44779	0.380914	3.29198	0.0303783	1.25376	96.1207	1.41906	1635.11	144.591	0.536553	3.99348	1.82368	0.219786	0.0543359	756.827	8.94521	61.2284	11.3253	64.277	22.4713	4.56477	20.028	3.33069	17.5053	3.23471	7.99605	1.1104	4.80544	0.402965	0.0856276
PAK122	8.06057	0.270841	<LOD	<LOD	49.2857	304.712	0.317512	71.6152	<LOD	<LOD	0.615941	55.4969	4.94309	1.95153	13.4112	25.9236	0.682654	4.92245	21363.3	2.09693	1.49543	2.85922	0.104169	1.05574	90.2683	1.01203	1653.24	264.737	0.635478	5.17653	0.259522	0.967957	0.100722	634.76	10.0616	61.7149	11.419	63.402	23.0716	4.70622	19.7702	3.27953	17.9666	3.22017	8.1713	1.10592	4.81957	0.394751	0.0824235
Ave.	28.9821	0.519184	8.94304	70.59	111.485	63.4	0.440667	48.8983	2.80059	0.0169153	0.137201	55.3349	0.713771	1.84136	19.1559	20.961	1.45508	1.91654	23752.3	1.21499	1.44092	0.951449	0.0820582	0.328286	20.2991	2.24104	2234.62	29.2334	0.42252	1.20579	3.68014	0.133923	0.036386	120.072	2.38784	13.2045	2.85622	16.1398	5.62364	1.20235	4.48631	0.916021	3.57869	0.750016	1.92623	0.27117	1.25366	0.155862	0.0921787
sd	9.92322	0.657895	8.28562	21.8031	33.7211	124.67	0.256835	18.8564	2.24784	0.0161304	0.148777	1.38709	1.23165	2.02547	2.96381	2.60924	0.315992	1.37614	11857	0.379096	0.927076	1.10669	0.112979	0.447098	35.3939	0.638474	369.117	59.2974	0.153465	1.43659	4.08954	0.202788	0.0248738	204.492	3.55397	20.91	4.08793	23.313	8.29214	1.71962	7.01424	1.21155	6.1875	1.18451	3.1039	0.401305	1.75926	0.146874	0.0268419
n	27	14	23	22	27	27	27	27	13	11	17	27	23	16	27	27	27	27	27	20	27	21	14	27	27	27	27	24	27	21	27	19	15	24	22	23	21	21	22	21	24	19	27	24	25	23	27	27	27
AFG200	0.449807	<LOD	4.94093	298.916	104.119	8994.31	29.2599	196.474	2.33189	30.1768	1.41284	37.0919	234.656	50.2267	0.0349444	0.294541	0.108444	1.67384	4.1954	19.5928	13.5908	21.6307	0.0799233	95.2001	707.403	1612.18	1173.34	2.61536	0.445622	0.255045	376.615	5.05544	0.00577673	<LOD	532.749	2137.01	299.845	1140.17	232.375	42.2417	172.496	26.3034	158.806	28.0778	75.1144	10.116	61.8183	6.59435	54.5514
AFG200	30.2855	<LOD	15.1911	790.352	121.768	8904.31	30.3662	195.898	671.711	29.9915	1.31224	36.0049	231.668	53.377	0.052743	0.304694	<LOD	2.08053	45.4308	19.3963	13.8037	20.7967	10.867	121.933	700.705	1620.42	1137.82	1.95116	0.471725	<LOD	377.971	4.83603	3.68616	0.546576	530.626	2161.09	297.501	1138.54	228.498	42.2797	166.806	26.0912	158.382	27.8366	77.0906	10.3022	60.741	6.61332	56.1881
AFG200	1.05643	<LOD	23.767	655.473	131.234	9071.07	30.818	221.299	326.758	30.0167	1.13692	35.5736	224.796	53.0655	0.0355558	0.304326	<LOD	1.99911	14.0513	19.295	14.0635	22.1368	11.5979	94.9612	702.393	1650.27	1135.42	2.33483	0.450236	0.563727	380.661	5.05181	1.80955	0.0187623	525.335	2141.16	294.212	1112	226.553	41.2136	168.052	25.9515	156.742	27.3893	77.162	10.2205	58.5798	6.90335	55.8875
AFG200	0.496532	<LOD	5.63963	301.315	143.63	8816.64	30.5359	216.624	<LOD	29.8925	1.32335	36.1052	229.707	50.8367	0.0349404	0.306819	<LOD	2.29652	3.90225	18.1095	14.1551	22.0484	<LOD	94.8678	707.092	1649.25	1142.33	2.63837	0.71883	0.260112	381.031	5.31007	0.00987359	0.057146	526.515	2173.74	301.164	1138.51	227.276	42.3197	165.366	26.0619	159.027	27.4115	77.107	10.3802	61.6225	6.91513	56.821
AFG200	0.188277	<LOD	6.74307	297.255	139.543	9034.35	30.7214	204.071	1.3033	29.7854	0.972966	36.1266	242.049	52.5437	0.0347349	0.340006	<LOD	2.05851	4.48061	17.5675	12.9986	22.4851	0.0664199	92.5022	615.993	1341.83	1029.63	2.91476	0.42618	0.156452	352.777	4.66977	0.000765833	0.0190985	460.297	1912.38	261.62	988.168	202.674	37.2008	150.846	23.298	138.316	24.101	66.8737	9.14977	53.3644	5.98096	44.1797
AFG200	0.816517	<LOD	11.4232	699.059	115.688	9182.49	31.4006	193.616	133.441	29.826	1.1172	35.3776	243.062	54.1938	0.0424709	0.310278	0.121574	2.81785	5.63707	18.5484	11.461	22.4431	0.442183	109.154	589.781	1215.04	1013.87	2.06601	0.638986	0.277184	360.355	4.81324	0.0467508	3.82201	441.916	1917.6	260.164	962.189	196.687	37.2629	139.578	22.1205	133.027	22.793	63.6802	8.6329	50.9129	5.60295	40.2588
AFG200	0.520625	<LOD	5.76673	333.856	115.616	9005.68	31.6032	192.262	6.57264	29.6407	1.1383	35.4546	244.933	58.8125	0.0387915	0.329031	0.0909663	2.58644	5.30804	17.8601	10.5463	22.1698	0.121107	95.152	579.571	1211.14	985.8	2.37832	0.589017	<LOD	347.753	4.49129	0.0258476	0.297892	437.541	1894.46	252.212	947.313	194.111	36.083	141.214	21.3227	131.709	22.6556	62.0012	8.35414	50.7876	5.58231	40.2897
AFG200	0.39387	<LOD	6.4584	318.36	88.1145	8961.79	30.677	220.328	33.6723	30.461	0.936141	35.5882	248.033	57.345	0.0416277	0.286379	0.192483	2.50666	5.07954	17.0814	13.537	21.5505	0.345348	96.087	601.049	1094.15	1037.51	1.93619	0.742817	0.273044	369.366	5.23552	0.0759192	1.28481	447.647	1947.28	263.381	980.155	198.909	39.2107	146.344	22.1969	136.835	23.7195	65.866	8.75573	54.6314	5.91915	38.7868
AFG200	0.735501	<LOD	5.95008	363.291	86.779	8786.79	30.5526	203.414	38.271	29.8624	0.959944	36.3763	235.45	58.7217	0.0397165	0.276554	0.056721	2.70608	5.19464	17.609	10.0714	21.0472	0.229332	95.7187	598.272	1128.68	1008.81	2.56101	0.600209	0.257883	351.979	4.99981	0.012785	2.45283	434.923	1897.69	258.745	954.269	196.891	36.3123	145.023	21.966	134.14	23.1711	64.7019	8.73336	51.7803	5.9224	39.2425
AFG200	1.44803	<LOD	5.65623	317.282	150.96	9293.27	30.9366	179.25	372.725	29.7397	1.04397	35.8938	243.759	55.2553	0.0395687	0.337755	<LOD	2.5846	6.81755	17.5887	10.9225	19.5487	2.36843	92.5149	617.496	1193.45	1040.67	1.73465	0.487523	<LOD	363.464	5.14142	0.038123	3.07913	437.945	1908.79	259.006	984.594	203.136	38.0669	148.213	22.4111	137.677	23.9133	66.6925	9.04272	53.8302	5.94789	41.035
AFG200	2.22407	<LOD	8.54765	756.771	91.8364	9577.33	28.8634	206.521	457.163	30.1358	1.41919	37.4854	229.93	53.4143	0.039924	0.268706	0.112052	1.57453	2.92698	16.9594	11.1835	34.1253	1.68885	109.075	750.991	1308.9	929.766	2.79357	0.362421	<LOD	317.789	4.22603	0.103594	72.3522	486.28	1821.67	272.292	1073.28	225.5	38.0963	159.636	26.706	154.437	29.4595	81.5329	10.4019	65.6478	7.13614	45.2233
AFG200	2.36876	0.093391	9.03206	495.591	111.324	9572.31	29.3406	192.669	169.013	30.0252	1.71656	37.1221	230.801	55.4235	0.0381997	0.30623	<LOD	0.788261	5.38318	17.4498	11.0955	30.203	1.25207	96.5714	761.719	1498.17	926.036	1.81646	0.211883	0.149103	318.162	4.47517	0.200656	12.4002	485.931	1815.46	269.578	1071.57	227.976	37.9058	163.932	27.1501	158.643	29.6647	83.9134	10.2621	65.5932	7.26736	50.2242
AFG200	0.849721	<LOD	8.15014	440.485	87.0721	9662.53	29.1522	204.662	80.4398	30.1493	1.47258	37.2081	232.5	49.4383	0.0384463	0.280151	<LOD	0.892567	3.47699	17.1399	11.4449	28.5164	0.447834	103.629	775.146	1486.08	938.04	1.87326	0.322255	0.303013	325.37	4.09574	0.0602852	9.25783	492.151	1821.38	272.453	1085.36	228.549	38.3581	164.015	27.652	159.126	30.1489	86.0993	10.558	66.5734	7.30702	51.0734
AFG200	0.293037	<LOD	7.77604	267.867	103.605	9321.19	29.0446	203.602	0.0878251	30.2398	1.42428	37.1206	222.33	53.2879	0.0349573	0.300626	<LOD	0.663648	2.5141	18.8238	13.7245	37.9475	0.0630295	99.1104	825.742	1955.22	1016.67	2.22268	0.281812	0.373399	358.885	4.66073	0.0363664	0.0697032	575.469	2101.37	309.098	1212.23	251.919	41.5408	180.986	29.7027	171.552	32.5336	90.2459	11.2107	70.3364	7.70158	68.4601
AFG200	0.386226	<LOD	8.20976	287.295	103.121	9418.75	29.3218	199.874	1.93638	30.2525	1.49072	36.8379	224.208	57.5278	0.0346963	0.300966	0.161771	0.767313	2.92074	18.9851	12.5962	34.3111	0.103746	102.995	824.384	1772.67	1036.11	1.98394	0.358753	0.0540207	363.438	4.52675	0.0165787	0.19742	560.044	2089	308.311	1202.27	250.377	41.4816	178.957	29.5542	171.424	32.368	89.8224	11.2792	71.0443	7.86925	62.4724
AFG200	1.14282	<LOD	7.02296	354.046	117.829	9261.57	29.2941	227.948	18.9893	30.1721	1.6122	36.9289	223.411	52.0336	0.0337965	0.311555	<LOD	0.884656	2.09821	18.7595	11.2549	37.2855	0.266048	96.9469	832.137	1892.92	1034.25	1.82348	0.360415	0.434449	359.992	4.18727	0.0659477	1.0903	565.65	2079.41	308.119	1210.41	251.105	42.0297	181.072	29.7163	172.996	32.2972	91.7246	11.3289	72.911	7.79622	67.2855
AFG200	1.45225	<LOD	5.06458	372.44	77.4137	9188.64	29.0692	192.145	21.1501	30.3989	1.73863	37.0186	223.692	53.2245	0.0352563	0.247319	<LOD	0.889944	2.39888	18.9803	11.0778	36.2484	0.174961	107.977	828.325	1952.14	1016.19	2.3164	0.228967	0.465829	357.952	4.42902	0.0309098	1.14935	566.956	2087.7	306.562	1214.96	249.409	41.3804	181.344	29.3733	171.641	32.685	91.1177	11.5552	72.1647	7.81918	65.9628
AFG200	0.72507	<LOD	7.86183	297.001	136.715	9536.28	29.2178	202.263	1.54953	30.4882	1.35588	36.7999	233.18	53.3075	0.0343285	0.325613	0.0759915	0.80669	2.11199	17.9551	11.8449	31.7368	<LOD	92.6556	751.354	1565.22	933.384	2.09108	0.227899	0.527946	323.253	4.15573	0.0117196	0.0431442	494.928	1833.47	271.905	1077.48	222.738	37.1926	163.657	26.654	156.697	29.218	81.7329	10.4818	65.8482	6.96124	53.2863
AFG200	0.375161	0.0945109	6.11616	289.603	144.767	9475.06	29.5007	184.602	<LOD	30.3668	1.45095	36.6383	232.087	57.52	0.0338039	0.331885	0.0330478	0.88587	2.25365	17.571	11.6192	32.2727	<LOD	94.1032	753.58	1581.76	946.83	1.90706	0.2415	0.504987	331.601	4.27493	<LOD	0.0437408	497.955	1846.35	273.925	1072.08	224.914	37.3737	163.349	26.3418	156.252	29.2506	83.0376	10.3485	65.0083	7.04468	54.2934
AFG200	14.5491	<LOD	10.0238	26491.2	134.358	9183.01	28.4325	209.581	970.72	29.3726	1.23293	35.1774	221.545	52.5366	0.0344704	0.311346	0.0982936	0.996027	5.33886	17.1002	12.5095	31.9932	0.427598	101.621	731.015	1503.74	885.659	1.9019	0.690787	0.0623968	320.372	4.08231	0.0282641	24.285	478.802	1771.29	263.792	1039.07	219.671	35.968	158.382	25.8587	152.495	28.3552	80.2281	10.165	63.1266	6.83469	51.1958
Ave.	3.03787	0.093951	8.46707	1721.37	115.275	9212.37	29.9054	202.355	183.769	30.0497	1.31339	36.3965	232.59	54.1046	0.0376486	0.303739	0.105134	1.62298	6.57604	18.1186	12.175	27.5248	1.79658	99.6388	712.707	1511.66	1018.41	2.19302	0.442892	0.307412	351.939	4.6359	0.329783	6.97195	498.983	1967.92	280.194	1080.23	222.963	39.1759	161.963	25.8216	153.496	27.8525	77.7872	10.0639	61.8161	6.78596	51.8359
sd	6.9471	0.000559925	4.24234	5684.99	21.6974	259.074	0.912505	12.1012	268.392	0.284276	0.235174	0.698986	7.96517	2.65778	0.00437183	0.0230984	0.0445013	0.76817	9.27718	0.832914	1.25845	6.31754	3.5034	7.37475	84.0455	259.182	78.3813	0.347576	0.167636	0.154231	21.226	0.390776	0.884626	16.5039	45.844	133.233	19.6926	88.2717	18.5681	2.28539	13.0014	2.68293	13.3316	3.33374	9.62805	0.943264	7.09721	0.728654	9.2798
n	20	2	20	20	20	20	20	20	18	20	20	20	20	20	20	20	10	20	20	20	20	20	17	20	20	20	20	20	20	16	20	20	19	19	20	20	20	20	20	20	20	20	20	20	20	20	20	20	20
RUS100	<LOD	0.156205	133.748	20.5846	37.7108	145.368	0.945728	76.5457	<LOD	41.059	0.273907	55.5209	259.284	0.0502612	0.0115738	0.606764	0.0371758	1.15398	6.24981	21.4687	21.8618	14.1575	0.0778686	89.0051	1085.17	22.9394	117.632	0.465874	<LOD	0.0832744	8.05553	0.126691	0.0112118	0.0340714	2584.82	5324.18	715.157	2702.55	477.235	275.44	346.952	45.2636	234.163	37.6826	85.1251	9.91628	36.2324	3.82793	2.04897
RUS100	0.190687	<LOD	32.4188	28.2928	31.7875	147.532	0.830117	69.8818	<LOD	38.9434	0.575506	57.3497	438.886	1.61149	0.0100395	0.670874	0.0166081	0.594966	2.87509	25.0289	22.0723	12.9176	0.109645	86.411	1614.97	21.6912	108.392	0.174913	0.0149061	0.0252931	17.7712	0.0948936	<LOD	0.0999943	3286.91	6423.27	845.078	2970.43	454.127	260.414	373.736	47.0889	258.044	46.2764	115.483	14.4983	68.0665	7.47609	3.88295
RUS100	<LOD	0.107057	121.754	63.9841	41.6475	149.339	0.885768	46.4512	116.76	40.3717	0.181336	56.0505	309.379	0.402692	0.0112422	0.647863	0.0447848	1.1359	6.25731	22.9	24.7957	16.1478	0.221769	89.1287	1232.71	21.6295	115.595	0.456535	0.0490816	0.0658469	8.76124	0.151214	<LOD	9.83074	2930.07	5845.5	777.542	2873.79	487.69	280.809	356.285	46.5772	251.594	40.7242	94.2671	11.5941	43.5817	4.558	2.66731
RUS100	0.20593	0.0547223	117.534	30.5686	44.6285	153.501	0.917701	102.104	50.558	40.0944	0.303342	56.1136	418.124	<LOD	0.0107772	0.684966	0.0353032	1.1445	6.61126	25.1256	26.4162	15.8629	0.157729	89.7523	1469.3	23.4755	92.5834	0.278052	0.0276093	0.221039	10.9544	0.156538	0.0317284	1.38746	3021.34	6277.8	831.995	3037.74	489.955	279.44	365.596	49.3404	266.938	46.3093	113.236	14.6462	57.2147	6.21372	3.40837
RUS100	<LOD	<LOD	125.685	23.3353	38.4937	154.317	0.945034	69.1219	0.483373	40.273	0.389989	56.0682	381.667	0.674607	0.0106404	0.651674	0.0132688	1.00104	6.72354	22.9971	23.6218	14.8792	0.736476	89.0852	1372.88	22.1712	92.8724	0.651187	0.00947089	0.14521	10.6261	0.124643	<LOD	0.0812811	2877.99	5868.04	781.476	2882.39	476.453	277.387	358.308	48.2618	263.525	44.2138	105.776	13.376	52.2287	5.64612	3.1169
RUS100	0.522989	<LOD	129.885	37.9568	46.9429	153.973	0.905402	57.8848	<LOD	39.73	0.153362	56.3778	329.248	<LOD	0.0111363	0.952633	0.0600291	1.06035	7.0395	23.5093	24.1211	16.0661	0.0423792	87.3542	1251.39	22.2672	99.9615	0.162374	0.019902	0.0691889	9.40305	0.0927506	<LOD	0.582404	2866.71	5805.3	771.955	2882.1	479.782	274.134	358.042	47.1006	250.084	41.3888	97.4576	11.9466	45.5266	4.58638	2.70213
RUS100	0.0202647	<LOD	123.164	31.1954	42.411	149.326	0.892858	58.9665	<LOD	39.8806	0.218244	56.6189	302.357	0.5952	0.0109857	0.625775	0.0161663	1.06799	5.21468	22.7941	23.8464	15.2553	0.0703007	87.8121	1195.67	21.6113	105.337	0.299719	0.0334389	0.338919	8.75227	0.180516	<LOD	0.00138199	2836.46	5726.2	748.137	2814.46	476.476	274.525	355.349	46.0894	244.216	40.0631	91.6179	11.0313	41.3647	4.25746	2.36929
RUS100	<LOD	1.31588	117.299	51.5534	87.8061	131.974	1.02304	70.1107	59.1215	39.439	0.386106	55.6698	224.528	0.960933	0.0115581	2.01419	0.040642	1.12707	6.4466	20.257	21.6446	13.8845	0.0951409	85.0034	1009.62	21.2702	137.243	0.594084	0.0735468	<LOD	7.50005	0.121289	0.010227	2.08223	2623.01	5193.43	676.17	2532.76	434.721	261.399	322.471	41.5499	218.217	35.216	78.9942	9.30745	33.73	3.28431	1.69747
RUS100	0.133433	0.0370183	31.0166	45.6997	30.9666	135.497	0.762904	59.9951	58.1304	38.9555	0.250809	57.9078	236.72	1.11368	0.0115594	0.564201	<LOD	0.631083	2.97028	21.4025	18.3466	12.5489	0.169115	83.8608	1082.76	20.1186	112.123	0.229534	<LOD	0.230478	12.5622	0.00649897	0.0150833	5.48795	2655.26	5279.37	720.731	2590.84	442.378	255.655	348.147	42.1573	212.828	34.8294	78.0919	8.48931	36.701	3.75427	1.94561
RUS100	0.0687417	<LOD	32.391	27.5251	29.8326	140.452	0.794804	55.2711	<LOD	39.0808	0.315918	57.5648	313.791	0.513778	0.0104857	0.597995	<LOD	0.732491	2.76526	22.866	21.2472	14.1018	0.0746916	85.3701	1301.54	21.5276	92.2454	0.309232	0.0245401	0.025527	13.9426	0.185365	0.00769874	0.0386554	2890.31	5736.63	774.002	2767.1	461.179	259.344	370.445	44.6767	232.811	38.9312	92.7529	10.7209	48.0115	4.93911	2.66524
Ave.	0.190341	0.334176	96.4896	36.0696	43.2227	146.128	0.890336	66.6333	57.0106	39.7828	0.304852	56.5242	321.398	0.74033	0.0109998	0.801693	0.0329973	0.964935	5.31533	22.8349	22.7974	14.5822	0.175511	87.2783	1261.6	21.8702	107.398	0.36215	0.031562	0.133864	10.8329	0.12404	0.0151898	1.96262	2857.29	5747.97	764.224	2805.42	467.999	269.855	355.533	45.8106	243.242	40.5635	95.2802	11.5526	46.2658	4.85434	2.65042
sd	0.162198	0.492624	42.5229	13.0565	15.8734	7.42724	0.0732572	14.4951	36.9124	0.65767	0.116967	0.7776	69.1597	0.449148	0.000489619	0.416734	0.0153785	0.211397	1.66261	1.45302	2.13457	1.20987	0.194028	1.93208	177.166	0.875819	13.4372	0.162274	0.019492	0.1022	3.00574	0.0494007	0.00860357	3.07996	197.171	383.571	49.0634	151.722	18.0002	9.01478	13.751	2.3562	17.4701	3.90349	12.3697	1.99486	10.0738	1.20831	0.644985
n	6	5	10	10	10	10	10	10	5	10	10	10	10	8	10	10	8	10	10	10	10	10	10	10	10	10	10	10	8	9	10	10	5	10	10	10	10	10	10	10	10	10	10	10	10	10	10	10	10
[truncated: 6 more columns]

## Sheet: Table S3
Table S3 Element concentration reference values for five ilmenite ores (GBW07838, GBW07839, GBW07840, GBW07841 and GBW07842) obtained from the certificate
Elements	units	GBW07838		GBW07839		GBW07840		GBW07841		GBW07842
		Mean	σ	Mean	σ	Mean	σ	Mean	σ	Mean	σ
Al2O3	wt%	5.19	0.16	4.23	0.08	6.73	0.12	2.21	0.08	3.68	0.1
CaO	wt%	13.86	0.24	3.86	0.14	0.98	0.12	6.69	0.26	10.32	0.22
CO2	wt%	0.5	0.04	0.15	0.04	1.25	0.12	0.15	0.02	0.32	0.04
FeO	wt%	15.6	0.36	11.17	0.24	29.65	0.16	24.88	0.18	20.53	0.24
K2O	wt%	0.23	0.02	0.021	0.004	0.03	0.004	0.17	0.02	0.21	0.02
MgO	wt%	8.79	0.42	19.4	0.32	3.05	0.1	2.88	0.08	5.78	0.2
MnO	wt%	0.32	0.02	0.28	0.02	0.24	0.02	0.62	0.02	0.53	0.02
Na2O	wt%	0.54	0.02	0.12	0.02	0.063	0.008	0.39	0.04	0.49	0.04
P	wt%	0.22	0.02	0.089	0.006	0.043	0.006	0.25	0.02	0.26	0.02
S	wt%	0.25	0.02	0.012	0.004	0.28	0.02	0.053	0.004	0.15	0.02
SiO2	wt%	33.46	0.38	37.85	0.48	2.57	0.1	14.22	0.18	24.02	0.16
TFe	wt%	19.23	0.22	18.88	0.28	51.36	0.32	37.87	0.44	27.1	0.14
TiO2	wt%	8.96	0.08	2.95	0.12	12.91	0.22	19.83	0.36	16.13	0.26
As	μg g-1	0.61	0.08	2.16	0.2	1.9	0.2	0.52	0.08	0.54	0.08
Ba	μg g-1	71	4.4	15	1.2	38.5	2.6	58.1	2.8	63.3	3.8
Cd	μg g-1	0.072	0.006	0.33	0.04	0.05	0.012	0.063	0.008	0.075	0.01
Co	μg g-1	84.4	4.4	104	8	236	18	55.5	5.6	68.1	6.6
Cr	μg g-1	47.4	3.4	916	52	4200	200	82.1	6.4	58.2	4
Cu	μg g-1	70.1	4.4	213	16	170	10	40.5	2.6	49.6	4
Ga	μg g-1	30.3	1.6	17.9	1.6	55.4	4.2	31.8	3.2	29	2.8
Li	μg g-1	12.7	1	1.68	0.18	0.95	0.12	4.89	0.56	8.63	0.88
Nb	μg g-1	30	2.4	14.5	1.6	4.25	0.54	49.1	5.2	44.2	4.4
Ni	μg g-1	91.2	5	700	46	611	34	52.6	3	68.9	4
Pb	μg g-1	6.85	0.5	371	26	7.58	0.78	6.7	1.1	6.72	0.72
Rb	μg g-1	7.28	0.58	0.65	0.14	0.35	0.04	4.92	0.54	6.38	0.84
Sr	μg g-1	334	32	53.5	5.8	47	5.6	308	26	340	30
Th	μg g-1	2.06	0.18	2.5	0.24	0.1	0.02	2.3	0.26	2.27	0.26
U	μg g-1	0.61	0.08	0.67	0.1	0.029	0.006	0.63	0.1	0.64	0.1
V	μg g-1	681	36	303	20	3300	200	1326	48	902	36
Zn	μg g-1	267	14	390	22	493	20	162	10	212	12
Zr	μg g-1	274	18	147	12	16.8	1.8	240	10	266	12
Y	μg g-1	21.5	1.6	12.3	1	1.52	0.2	22.8	1.2	23.3	1.2
La	μg g-1	28.2	2.2	3.71	0.36	1.34	0.18	32.6	2	32.8	2
Ce	μg g-1	72.1	5.4	12.9	1	3.39	0.4	87.8	5.4	85.2	5.2
Pr	μg g-1	11.1	1	2.6	0.2	0.46	0.06	13.7	1	13.3	0.8
Nd	μg g-1	54.6	4	14.8	1.2	2.26	0.24	66.3	4.2	64.3	3.6
Sm	μg g-1	12.5	1	4.51	0.4	0.44	0.06	14.4	1	14.4	1.2
Eu	μg g-1	3.65	0.26	1.01	0.1	0.17	0.02	4.14	0.32	4.1	0.34
Gd	μg g-1	9.91	1.1	3.75	0.58	0.42	0.06	11.2	1.4	11.4	1.2
Tb	μg g-1	1.43	0.14	0.62	0.08	0.056	0.008	1.56	0.1	1.62	0.1
Dy	μg g-1	6.49	0.44	3.26	0.24	0.28	0.04	7.05	0.36	7.14	0.32
Ho	μg g-1	0.97	0.08	0.53	0.06	0.051	0.006	1.04	0.06	1.07	0.06
Er	μg g-1	2.18	0.18	1.22	0.1	0.14	0.02	2.28	0.14	2.32	0.14
Tm	μg g-1	0.24	0.04	0.16	0.02	0.022	0.004	0.26	0.02	0.28	0.04
Yb	μg g-1	1.28	0.14	0.85	0.1	0.12	0.02	1.32	0.12	1.37	0.12
Lu	μg g-1	0.16	0.02	0.11	0.02	0.019	0.004	0.16	0.02	0.17	0.04

## Sheet: Table S4
Table S4 Procedure blank and method limits of quantitation (LOQ)
Elements	isotopes	Procedures Blank (ng g-1)			Limtis of Quantitation (μg g-1)
		NH4HF2 (n=13)	HNO3-HF (n=5)		NH4HF2 (n=11)	HNO3-HF (n=11)
Li	7	0.0581571	0.0754707		0.327712	0.295151
Be	9	0.00105701	0.00151809		0.0282673	0.0189937
Sc	45	0.0447813	0.071312		0.55377	0.339
Ti	47	1.57787	1.45573		2.49432	3.44073
V	51	0.0215873	0.0605977		0.294199	0.330186
Cr	53	0.345147	0.300693		3.67345	3.89453
Co	59	0.0212372	0.0115491		0.087512	0.0720703
Cu	63	0.0469615	0.0755703		0.869353	0.628651
Zn	66	1.33719	1.85707		3.54896	3.28409
Ga	71	0.00294957	0.0370952		0.0128023	0.0309129
Rb	85	0.0097594	0.0172824		0.131441	0.177377
Sr	88	0.0152733	0.0241388		0.172928	0.258243
Y	89	0.000858096	0.0017319		0.0285661	0.0271436
Zr	90	0.0169414	0.0208618		0.11364	0.0918898
Nb	93	0.0241401	0.0257322		0.267481	0.130245
Cs	133	0.000575848	0.000564715		0.0122238	0.00811673
Ba	137	0.0454504	0.0640952		0.500948	0.602425
La	139	0.00248089	0.00292296		0.0220396	0.0242788
Ce	140	0.0018406	0.00255687		0.178577	0.0207305
Pr	141	0.000201009	0.000321672		0.0107609	0.00693189
Nd	146	0.00112599	0.00283109		0.0682949	0.0346828
Sm	147	0.000656656	0.000917067		0.0859759	0.0412062
Eu	153	0.000302691	0.000485315		0.0103517	0.0157209
Gd	158	0.000412248	0.00117279		0.0262754	0.0230257
Tb	159	3.89932e-05	0.000430699		0.00867745	0.00537595
Dy	163	0.000485191	0.000371246		0.0169143	0.0273967
Ho	165	5.95859e-05	0.000190237		0.0101949	0.00672907
Er	166	0.00206565	0.00246301		0.0397281	0.0198514
Tm	169	9.38362e-05	0.000141725		0.00655062	0.00583638
Yb	172	0.0013555	0.00123954		0.0578428	0.0200604
Lu	175	8.62797e-05	0.000218403		0.00587046	0.00480805
Hf	178	0.000860204	0.000571482		0.0547325	0.013453
Ta	181	0.00900186	0.010002		0.053593	0.0462652
Tl	205	0.00447508	0.00595196		0.0251245	0.0309552
Pb	208	0.466185	0.445611		0.996455	0.88217
Th	232	0.000513262	0.000680111		0.0160681	0.00850428
U	238	0.000194312	0.000531536		0.0140065	0.0169638

## Sheet: Table S5
Table S5 Results of determinations of thirty-seven elements in nine samples digested by NH4HF2 digestion. RSD is in %.
			GBW07838 (n=4)			GBW07839 (n=3)			GBW07840 (n=3)			GBW07841 (n=20)			GBW07842 (n=4)			RGPMR (n=13)			PAK122 (n=7)			AFG200 (n=8)			RUS100 (n=10)
Elements	Isotopes	Units	AVE.	SD	RSD	AVE.	SD	RSD	AVE.	SD	RSD	AVE.	SD	RSD	AVE.	SD	RSD	AVE.	SD	RSD	AVE.	SD	RSD	AVE.	SD	RSD	AVE.	SD	RSD
Li	7	μg g-1	11.8441	1.43653	12.1286	1.56158	0.0814845	5.21808	0.86903	0.0203319	2.3396	4.31447	0.319508	7.4055	7.54908	0.541727	7.17606	0.399372	0.148473	37.1768	35.8951	0.669733	1.86581	1.90838	0.0887052	4.64819	1.32794	0.104073	7.83722
Be	9	μg g-1	1.82435	0.12329	6.75804	0.509408	0.0158719	3.11574	0.0304167	0.00514696	16.9215	0.8466	0.069925	8.25951	1.3624	0.0881088	6.4672	2.96086	0.148948	5.03055	0.884015	0.0530241	5.9981	0.0321618	0.00572939	17.8143	1.0797	0.101415	9.39285
Sc	45	μg g-1	32.782	1.33529	4.07325	17.5374	0.734521	4.18831	16.8608	0.345199	2.04734	12.1481	0.294989	2.42827	21.1485	1.35733	6.41808	270.618	16.9586	6.2666	6.86616	0.827715	12.055	1.68891	0.121405	7.18835	12.4518	1.14804	9.21987
V	51	μg g-1	684.533	27.9577	4.0842	311.862	9.52843	3.05533	3204.31	12.5852	0.392758	1333.5	31.0737	2.33024	831.047	56.1951	6.76196	1334.39	87.4062	6.5503	34.3339	1.95706	5.70009	207.557	4.81048	2.31767	112.111	4.92939	4.39687
Cr	53	μg g-1	41.4181	2.73297	6.59849	949.997	30.0846	3.16681	4001.34	28.9309	0.723031	74.8028	3.34069	4.466	50.0924	1.82606	3.64538	2396.13	151.871	6.33817	53.9114	6.20393	11.5077	45.0658	2.06091	4.57312	21.1382	2.39713	11.3403
Co	59	μg g-1	82.2764	3.8278	4.65237	106.632	2.87632	2.69742	264.109	9.90623	3.75081	56.5727	1.55831	2.75453	64.0524	4.35077	6.79251	30.1897	4.1664	13.8007	72.026	0.611874	0.849518	61.6827	1.62185	2.62934	63.2419	4.45323	7.04158
Cu	63	μg g-1	66.1135	4.07599	6.16514	201.974	5.47914	2.7128	165.499	0.405301	0.244896	44.5949	1.63032	3.65584	51.0394	2.75997	5.40752	25.9944	4.61771	17.7642	24.0255	3.05788	12.7277	16.0878	0.68813	4.27733	175.452	11.8862	6.7746
Zn	66	μg g-1	254.752	15.6232	6.1327	373.532	7.86816	2.10642	477.442	2.46238	0.515746	159.323	7.58666	4.76182	192.376	9.90709	5.14985	65.954	10.5316	15.9681	22141.3	112.615	0.508619	199.284	31.8831	15.9988	223.799	20.215	9.03267
Ga	71	μg g-1	30.1209	1.04856	3.48118	17.9221	0.520876	2.90634	54.0807	0.274589	0.507738	30.8268	0.798929	2.59167	25.6588	1.92122	7.48759	0.413898	0.076002	18.3625	9.00591	1.38423	15.3702	13.6353	0.604527	4.43354	19.2065	0.856099	4.45734
Rb	85	μg g-1	6.40341	0.29431	4.59615	0.611273	0.0358725	5.86849	0.347912	0.0205831	5.91618	4.2849	0.277323	6.4721	5.28855	0.589953	11.1553	0.176314	0.104406	59.2161	7.66548	0.149593	1.95152	0.997797	0.0379753	3.80591	0.896615	0.0523109	5.83427
Sr	88	μg g-1	340.615	12.1576	3.56931	47.9797	0.725115	1.51129	40.8617	1.45538	3.56173	315.233	9.27221	2.94139	320.251	23.2168	7.24958	0.3943	0.195616	49.6109	4.59064	0.0655493	1.42789	82.6519	2.77746	3.36043	29.7742	1.43978	4.83566
Y	89	μg g-1	23.6553	0.910602	3.84947	13.5379	0.342227	2.52792	1.40472	0.0817382	5.81884	23.7839	2.003	8.42168	22.8928	1.614	7.05026	0.284117	0.173845	61.1877	79.2426	0.408933	0.516052	726.257	54.9362	7.56429	208.68	19.1224	9.16352
Zr	90	μg g-1	279.88	13.8599	4.9521	150.833	1.5799	1.04745	16.0123	0.563751	3.52073	216.955	18.6688	8.60494	230.218	9.31065	4.04427	676.494	42.7268	6.31592	58.4348	2.94046	5.03205	1535.55	85.0286	5.53734	78.2194	5.91294	7.55943
Nb	93	μg g-1	30.3328	2.19475	7.23557	14.322	0.297794	2.07927	1.83332	0.105462	5.7525	54.6712	2.11036	3.86009	42.1927	3.12848	7.41474	8053.44	508.475	6.31377	2428.18	36.9147	1.52027	1231.68	51.7641	4.20272	92.9894	6.87401	7.39225
Cs	133	μg g-1	0.186196	0.00484353	2.60131	0.0646669	0.00332369	5.13971	0.0275488	0.00382002	13.8664	0.304639	0.0131961	4.3317	0.236287	0.0169429	7.17046	0.0164918	0.00861419	52.2333	0.079013	0.0033222	4.20463	0.161632	0.00911797	5.6412	0.0434757	0.0070679	16.2571
Ba	137	μg g-1	64.3894	1.80675	2.80597	12.765	0.228116	1.78704	34.4543	0.996119	2.89113	52.8203	2.48179	4.69855	58.107	5.00712	8.61707	1.15266	0.635501	55.1336	201.212	1.27866	0.63548	15.7692	0.856941	5.43428	11.7252	0.562913	4.80086
La	139	μg g-1	29.7704	0.861781	2.89476	3.97791	0.108678	2.73205	1.40904	0.0246242	1.74758	33.508	1.8778	5.60402	32.6994	1.00898	3.08564	0.133104	0.117218	88.0647	19.9582	0.163771	0.82057	555.092	32.7924	5.90757	808.978	71.5327	8.84236
Ce	140	μg g-1	79.093	2.10616	2.66289	14.2648	0.306655	2.14974	3.35816	0.0379083	1.12884	93.6411	4.87578	5.20688	88.2318	2.64765	3.00078	0.289503	0.223639	77.2494	92.0831	0.870028	0.94483	2068.29	118.745	5.74123	1401.07	126.467	9.02644
Pr	141	μg g-1	11.8787	0.373466	3.144	2.77099	0.0379852	1.37081	0.469081	0.0113387	2.41722	13.9038	0.701179	5.04306	13.0898	0.413921	3.16216	0.0322721	0.0261797	81.1218	13.3055	0.112429	0.844984	302.795	15.9167	5.2566	165.722	15.0248	9.06631
Nd	146	μg g-1	56.7127	1.91784	3.38167	15.2018	0.423017	2.78268	2.16963	0.0663356	3.05747	65.4425	2.88902	4.41459	62.4697	2.08295	3.33433	0.123534	0.0925967	74.9565	61.3573	0.46493	0.757742	1187.84	55.9681	4.71176	493.454	39.2364	7.95137
Sm	147	μg g-1	13.5921	0.390285	2.87142	4.96656	0.134785	2.71384	0.472858	0.0189018	3.99735	15.0206	0.624304	4.15632	14.5591	0.465473	3.19713	0.0289815	0.0191086	65.9338	17.2121	0.254796	1.48033	210.854	10.0888	4.78474	74.5499	6.53155	8.76131
Eu	153	μg g-1	4.13585	0.0770556	1.86312	1.14067	0.0567436	4.9746	0.173012	0.00689207	3.98357	4.54567	0.197886	4.3533	4.40614	0.117147	2.65872	0.00948345	0.00721022	76.0296	3.36995	0.0377375	1.11982	36.4121	1.84023	5.05389	43.1342	3.47436	8.05479
Gd	158	μg g-1	11.2035	0.482855	4.30986	4.1404	0.310028	7.48787	0.40269	0.012927	3.21015	12.0192	0.501156	4.16962	12.0277	0.370094	3.07702	0.0289401	0.0180413	62.3401	15.0417	0.136738	0.90906	159.812	7.96905	4.98653	54.2793	4.83289	8.90375
Tb	159	μg g-1	1.4942	0.0500509	3.34969	0.66539	0.0117109	1.76001	0.0491511	0.00312576	6.35948	1.48526	0.0690259	4.6474	1.46052	0.0495921	3.3955	0.00651771	0.00361945	55.5325	2.32953	0.0303525	1.30295	24.8901	1.23945	4.9797	7.06896	0.545222	7.7129
Dy	163	μg g-1	6.87218	0.196682	2.86201	3.43061	0.0450458	1.31306	0.26618	0.00979787	3.68092	6.86844	0.305702	4.45082	6.85966	0.174641	2.54592	0.0432296	0.0249333	57.6764	13.3219	0.128146	0.96192	143.795	7.20164	5.00825	35.6278	2.88085	8.08596
Ho	165	μg g-1	1.06079	0.0261811	2.46808	0.570165	0.0169102	2.96584	0.0533196	0.00247243	4.63699	1.04202	0.0468522	4.49628	1.03434	0.0368148	3.55926	0.0103319	0.00612646	59.2965	2.57235	0.0275733	1.07191	27.6752	1.38993	5.02229	6.05635	0.50946	8.41199
Er	166	μg g-1	2.16281	0.0458737	2.12102	1.34327	0.0300835	2.23957	0.127991	0.00971056	7.58693	2.14772	0.103299	4.80969	2.15512	0.111369	5.16765	0.0325044	0.0199191	61.2812	6.82918	0.0684231	1.00192	73.207	3.4629	4.73029	14.2409	1.1895	8.35272
Tm	169	μg g-1	0.255467	0.0136813	5.35543	0.156765	0.00826504	5.27224	0.0188198	0.000655988	3.48562	0.235522	0.0124607	5.29068	0.249767	0.0124825	4.99768	0.0071825	0.00369013	51.3766	0.934033	0.0126536	1.35473	10.4028	0.551731	5.30366	1.65187	0.126532	7.65997
Yb	172	μg g-1	1.30977	0.0526295	4.01823	0.86803	0.0627193	7.22548	0.144268	0.019251	13.344	1.19923	0.072546	6.04939	1.20703	0.0463556	3.84047	0.0549101	0.0279957	50.9846	5.04271	0.0646907	1.28285	57.4033	2.75837	4.80525	7.68781	0.679319	8.83631
Lu	175	μg g-1	0.157376	0.00363381	2.30899	0.103197	0.0057911	5.61169	0.0171837	0.00133096	7.74548	0.143653	0.00924594	6.43632	0.14669	0.00500637	3.4129	0.0118218	0.00399941	33.8308	0.571245	0.012111	2.12011	6.1413	0.30756	5.00806	0.86891	0.0689986	7.94082
Hf	178	μg g-1	7.71929	0.298734	3.86996	4.09356	0.0415682	1.01545	0.51273	0.00709205	1.38319	5.2903	0.668847	12.6429	6.07365	0.253825	4.17912	31.9005	2.07084	6.49156	2.20483	0.111786	5.07007	49.6443	2.44976	4.93462	2.39118	0.2459	10.2836
Ta	181	μg g-1	2.07671	0.11646	5.60791	1.05978	0.0225613	2.12886	0.109986	0.00304091	2.76482	3.01463	0.0772763	2.56338	2.43216	0.217422	8.93945	679.695	41.4632	6.10027	68.8239	0.922712	1.34069	139.736	7.87699	5.63706	7.51641	1.05895	14.0885
Tl	205	μg g-1	0.171265	0.00710044	4.14587	0.0156804	0.00354283	22.594	0.00964556	0.00175999	18.2467	0.0612329	0.00573149	9.36015	0.0964209	0.00864629	8.96724	0.00723617	0.00227357	31.4194	0.531589	0.109246	20.5509	0.0335567	0.00544783	16.2347	0.010664	0.0038496	36.0989
Pb	208	μg g-1	6.63904	0.818057	12.3219	405.457	5.07972	1.25284	6.07441	0.594832	9.79243	5.61187	0.819871	14.6096	5.01852	0.573927	11.4362	1.88287	0.369383	19.6181	2367.82	24.7094	1.04355	163.975	8.52772	5.20061	14.2507	1.48574	10.4257
Th	232	μg g-1	1.86582	0.0771262	4.13364	2.24579	0.117758	5.2435	0.0230474	0.0018898	8.19963	2.05444	0.139978	6.81343	1.93624	0.126945	6.55623	0.330284	0.162966	49.3412	17.6582	0.232578	1.31711	685.869	93.2662	13.5982	31.608	2.85861	9.04393
U	238	μg g-1	0.578529	0.0250559	4.33096	0.661433	0.0150408	2.27396	0.00974231	0.00115362	11.8413	0.618852	0.0238249	3.84985	0.595411	0.0436101	7.32438	15.7471	1.01475	6.44402	10.7322	0.173111	1.61301	340.023	9.49654	2.79291	27.8409	1.96492	7.05767
TiO2	47	wt%	8.74705	0.109245	1.24894	2.87437	0.0258084	0.897879	13.0049	0.3173	2.43985	20.0388	0.715061	3.56838	16.7722	0.73703	4.39435	94.4826	3.71346	3.93031	53.0285	1.01208	1.90856	37.1132	0.993277	2.67635	11.8837	0.393935	3.31493

## Sheet: Table S6
Table S6 Results of determinations of thirty-seven elements in nine samples digested by closed-vessel acid digestion. RSD is in %.
			GBW07838 (n=3)			GBW07839 (n=3)			GBW07840 (n=3)			GBW07841 (n=17)			GBW07842 (n=3)			RGPMR (n=9)			PAK122 (n=17)			AFG200 (n=15)			RUS100 (n=12)
Elements	Isotopes	Units	AVE.	SD	RSD	AVE.	SD	RSD	AVE.	SD	RSD	AVE.	SD	RSD	AVE.	SD	RSD	AVE.	SD	RSD	AVE.	SD	RSD	AVE.	SD	RSD	AVE.	SD	RSD
Li	7	μg g-1	11.8593	1.34267	11.3217	1.78911	0.110245	6.16199	1.02219	0.0901466	8.81897	4.79184	0.32542	6.79112	8.27313	0.219891	2.6579	0.316326	0.116578	36.8537	37.8554	3.55898	9.40151	2.16256	0.116472	5.38583	1.44795	0.112384	7.76154
Be	9	μg g-1	2.01177	0.244763	12.1666	0.627401	0.046038	7.33789	0.0374108	0.00326228	8.72013	0.947922	0.0733952	7.74274	1.49499	0.064602	4.32122	3.23828	0.288665	8.91417	0.828746	0.0800476	9.65888	0.0336022	0.00984386	29.2953	1.07953	0.0509144	4.71634
Sc	45	μg g-1	32.7721	2.08849	6.37275	17.906	0.216378	1.20841	17.4921	0.178525	1.0206	12.389	0.789589	6.37332	23.5424	0.352381	1.49679	274.698	15.5783	5.67105	7.17862	1.1677	16.2664	1.85504	0.232938	12.557	12.681	1.89282	14.9265
V	51	μg g-1	697.443	40.6162	5.82359	322.918	3.58473	1.11011	3314.94	59.446	1.79328	1357.11	53.7804	3.96287	941.561	8.38278	0.890306	1120.14	79.7734	7.12176	36.6725	4.39196	11.9762	204.031	11.8419	5.80393	113.837	3.30428	2.90263
Cr	53	μg g-1	43.3936	4.73626	10.9146	959.284	15.1034	1.57444	4421.62	266.283	6.02231	82.2009	6.10087	7.4219	57.6455	2.87961	4.99537	2479.78	100.665	4.05944	62.0957	10.2057	16.4354	47.723	4.16118	8.71945	23.9223	3.65645	15.2847
Co	59	μg g-1	85.4129	5.90356	6.91179	110.953	2.51284	2.26479	255.462	15.9558	6.24587	58.7861	3.08918	5.25495	73.8181	0.918444	1.2442	13.572	4.28586	31.5786	70.8849	5.08168	7.16891	63.0218	3.61121	5.73009	65.156	2.45869	3.77355
Cu	63	μg g-1	68.7581	4.62786	6.73063	210.132	4.78849	2.2788	171.787	1.29456	0.753589	45.4878	2.78441	6.12123	54.9657	4.36853	7.94773	23.7117	1.47854	6.23548	27.7486	5.99703	21.612	19.3983	5.5874	28.8036	185.457	4.83169	2.60529
Zn	66	μg g-1	266	17.9218	6.73751	382.605	8.44518	2.20728	489.574	3.95743	0.808342	168.571	6.80304	4.03572	228.91	6.95826	3.03973	66.9757	4.14175	6.18395	20330.1	1632.27	8.02884	186.615	20.944	11.2231	235.058	18.5296	7.88299
Ga	71	μg g-1	29.9323	1.51944	5.07626	18.1144	0.418014	2.30763	55.0961	0.557105	1.01115	31.594	1.59732	5.05578	29.062	0.499774	1.71968	0.426867	0.143364	33.5853	9.4686	2.12442	22.4364	14.6926	1.27769	8.69616	20.5076	0.454503	2.21626
Rb	85	μg g-1	6.23083	0.412034	6.61283	0.594342	0.0112477	1.89246	0.348869	0.00905628	2.59589	4.23233	0.124239	2.93547	5.57174	0.234671	4.21182	0.105451	0.0734409	69.6443	7.03064	0.350246	4.98171	1.02152	0.0629858	6.1659	0.911804	0.0493407	5.41133
Sr	88	μg g-1	333.325	12.5374	3.7613	47.8235	0.845848	1.76869	42.2867	1.05639	2.49817	314.332	11.1558	3.54906	353.89	2.38706	0.674521	0.252032	0.130737	51.8731	4.54317	0.315112	6.93595	86.1075	5.86222	6.80802	29.5829	1.29672	4.38335
Y	89	μg g-1	23.3963	0.954255	4.07867	13.6472	0.147664	1.08201	1.39387	0.0323817	2.32316	24.2594	0.962098	3.96589	25.4928	0.149733	0.587355	0.186555	0.125789	67.4273	73.7972	4.50336	6.10234	721.252	59.9886	8.31729	182.917	19.5121	10.6672
Zr	90	μg g-1	305.375	10.0437	3.28898	152.831	4.17887	2.73431	16.5353	0.295715	1.78839	214.582	16.6634	7.76553	280.181	16.5072	5.89162	695.702	23.5836	3.38989	59.4227	5.30361	8.92521	1539.88	88.988	5.77888	75.1809	4.8716	6.47984
Nb	93	μg g-1	30.2424	1.72781	5.71321	14.552	0.328142	2.25497	2.01092	0.153132	7.61502	54.787	3.98661	7.27656	47.4686	0.378049	0.79642	4455.85	366.101	8.21618	2246.12	271.053	12.0676	1141.02	76.837	6.73408	99.5518	12.0651	12.1194
Cs	133	μg g-1	0.192894	0.0101119	5.24218	0.0659153	0.00239344	3.63109	0.0306301	0.00237616	7.75758	0.314921	0.0164782	5.2325	0.255257	0.00841089	3.29507	0.0113466	0.00652089	57.4698	0.0810965	0.00922508	11.3754	0.161157	0.00949458	5.89151	0.0459708	0.00604873	13.1578
Ba	137	μg g-1	62.9182	2.50668	3.98402	12.9621	0.304401	2.34839	34.7041	0.356567	1.02745	53.0852	1.49805	2.82197	58.7555	0.768917	1.30867	0.749936	0.355745	47.4367	193.198	11.3876	5.89428	16.6636	1.01161	6.07081	12.3525	0.979993	7.93357
La	139	μg g-1	28.907	1.24565	4.30916	3.87362	0.0108701	0.280618	1.39881	0.0520211	3.71896	34.2926	1.14148	3.32864	33.3933	1.11068	3.32605	0.0867216	0.0916355	105.666	18.3303	1.32376	7.2217	527.969	42.3407	8.01954	736.479	81.4178	11.055
Ce	140	μg g-1	77.0077	3.74612	4.86461	14.1669	0.222496	1.57053	3.35442	0.113967	3.39751	95.7886	2.91353	3.04162	90.9546	2.62601	2.88717	0.209317	0.180722	86.339	84.9619	5.29723	6.23483	1957.13	148.931	7.60967	1278.69	133.586	10.4471
Pr	141	μg g-1	11.4524	0.514749	4.4947	2.68831	0.0292426	1.08777	0.475987	0.0224368	4.71373	14.2082	0.481681	3.39017	13.5595	0.408609	3.01344	0.0237953	0.0226042	94.9943	12.269	0.857627	6.99018	283.015	20.5454	7.25946	150.854	16.0478	10.638
Nd	146	μg g-1	55.5875	2.71985	4.89292	14.8996	0.290279	1.94823	2.21628	0.107158	4.83505	67.7386	2.26963	3.35057	64.7198	1.93539	2.99041	0.0862046	0.0736017	85.3802	57.8518	4.3832	7.57661	1123.99	81.9918	7.29469	484.033	52.3326	10.8118
Sm	147	μg g-1	13.1523	0.452452	3.4401	4.77503	0.0756679	1.58466	0.466372	0.022963	4.92374	15.3706	0.477373	3.10576	14.9033	0.690984	4.63645	0.0209604	0.015076	71.9262	15.9658	1.25435	7.85644	208.253	13.51	6.48732	72.4936	7.75797	10.7016
Eu	153	μg g-1	3.92427	0.105404	2.68594	1.12319	0.0171045	1.52285	0.177901	0.00708608	3.98317	4.56528	0.175183	3.83729	4.49616	0.196357	4.36722	0.00684105	0.00638554	93.3416	3.08502	0.220053	7.13294	35.9913	2.32828	6.46902	40.7529	5.48425	13.4573
Gd	158	μg g-1	11.6091	0.240973	2.07572	4.01279	0.343626	8.56327	0.411581	0.0227901	5.53722	12.4135	0.539844	4.34884	12.3677	0.528078	4.26983	0.0189391	0.011423	60.3142	13.813	1.0841	7.84841	160.309	11.3828	7.10052	53.2808	6.1094	11.4664
Tb	159	μg g-1	1.42991	0.065438	4.57637	0.663894	0.025951	3.90891	0.0553116	0.00330873	5.98197	1.53956	0.0651241	4.23004	1.5319	0.0308064	2.01099	0.00401092	0.00239534	59.7205	2.16236	0.155789	7.20458	24.8456	1.61282	6.49138	6.77017	0.71397	10.5458
Dy	163	μg g-1	6.68146	0.471338	7.05442	3.30063	0.114158	3.45867	0.289534	0.00940843	3.24951	7.06623	0.289622	4.09867	7.12924	0.221633	3.10879	0.0271423	0.0156098	57.511	12.0782	1.01307	8.38758	142.112	8.94426	6.29379	33.5539	3.40038	10.1341
Ho	165	μg g-1	1.00284	0.0364143	3.6311	0.55193	0.0165914	3.00606	0.0526396	0.00520793	9.89356	1.04512	0.0368858	3.52934	1.05797	0.0443894	4.19572	0.00689913	0.00422422	61.2283	2.34149	0.194118	8.29035	27.1533	1.78177	6.56189	5.85477	0.638688	10.9088
Er	166	μg g-1	2.10333	0.089635	4.26158	1.25795	0.00672977	0.534979	0.140858	0.00999727	7.09744	2.16793	0.0743725	3.43057	2.2517	0.109469	4.86159	0.0229804	0.0154437	67.2036	6.1883	0.521025	8.41953	72.1536	4.43927	6.15252	13.6777	1.35994	9.9428
Tm	169	μg g-1	0.23533	0.0110392	4.69093	0.145841	0.00294477	2.01917	0.0188932	0.00195347	10.3395	0.238426	0.00967471	4.05773	0.243148	0.00855511	3.51847	0.00439219	0.00282378	64.2909	0.886357	0.0728122	8.21477	10.3918	0.624373	6.0083	1.60093	0.144791	9.04415
Yb	172	μg g-1	1.25093	0.0540635	4.32187	0.817626	0.0319956	3.91323	0.110218	0.00400385	3.63265	1.21522	0.0444627	3.65883	1.24778	0.0479158	3.84007	0.0396655	0.0183941	46.3732	4.70587	0.379175	8.05749	57.636	3.99068	6.92393	7.57461	0.654497	8.64066
Lu	175	μg g-1	0.155244	0.0107657	6.9347	0.104578	0.00602961	5.76567	0.0172814	0.00181102	10.4796	0.146971	0.00794076	5.40295	0.149762	0.00599785	4.00492	0.00881581	0.0033446	37.9387	0.533537	0.0435492	8.16236	6.19713	0.342032	5.51919	0.826914	0.0652655	7.89266
Hf	178	μg g-1	8.00152	0.332102	4.15049	3.94555	0.0461418	1.16946	0.52194	0.00908406	1.74044	5.37597	0.760595	14.1481	7.2793	0.132631	1.82203	32.3471	0.762151	2.35617	2.25576	0.290995	12.9001	50.809	2.43623	4.79487	2.3938	0.532943	22.2635
Ta	181	μg g-1	2.07164	0.146724	7.08252	1.07616	0.0393721	3.65857	0.118856	0.00149446	1.25737	3.14358	0.289756	9.21741	2.82808	0.0842929	2.98057	350.658	39.6437	11.3055	71.3531	13.6625	19.1477	123.026	5.32859	4.33127	8.00083	1.944	24.2974
Tl	205	μg g-1	0.160001	0.017153	10.7206	0.0150625	0.00199674	13.2563	0.00973657	0.00174172	17.8885	0.060194	0.00793671	13.1852	0.10366	0.0027954	2.69669	0.00509275	0.000876642	17.2135	0.662846	0.106784	16.1099	0.0380895	0.00374402	9.82955	0.0134058	0.00299151	22.3151
Pb	208	μg g-1	6.81691	1.47891	21.6947	380.783	10.0565	2.64102	5.96383	0.500341	8.38958	5.5129	0.594569	10.7851	5.52734	0.366923	6.63833	1.76613	0.302048	17.1023	1912.74	151.32	7.91118	152.377	6.03864	3.96295	12.6305	1.96663	15.5704
Th	232	μg g-1	1.77119	0.0348031	1.96495	2.22635	0.121258	5.44648	0.0280662	0.0017148	6.10982	2.06698	0.191066	9.24372	1.98714	0.0173929	0.875273	0.279466	0.157029	56.1891	16.3532	1.86003	11.3741	661.522	83.1679	12.5722	28.0281	3.52547	12.5784
U	238	μg g-1	0.574072	0.027514	4.79278	0.624567	0.00992382	1.58891	0.00863243	0.00199561	23.1176	0.640486	0.042983	6.711	0.619855	0.00969008	1.56328	15.908	0.29001	1.82305	9.92178	1.05159	10.5988	311.244	15.608	5.01472	25.2015	2.46164	9.76783
TiO2	47	wt%	8.72809	0.26892	3.08108	2.87434	0.100936	3.51163	13.0272	0.312675	2.40016	19.8149	0.824644	4.16173	15.9544	0.885757	5.5518	51.2866	4.9413	9.63468	53.6691	4.39831	8.19524	36.5234	1.65173	4.5224	11.1555	0.50093	4.49044

## Sheet: Table S7
Table S7 Element concentrations for the pressed powder pellet of rutile RGPMR measured by LA–ICP–MS
Elements	Li	Be	B	Na	Mg	Al	SiO2	P	K	Ca	Sc	TiO2	V	Cr	MnO	FeO	Co	Cu	Zn	Ga	Ge	As	Rb	Sr	Y	Zr	Nb	Mo	Ag	Cd	Sn	Sb	Cs	Ba	La	Ce	Pr	Nd	Sm	Eu	Gd	Tb	Dy	Ho	Er	Tm	Yb	Lu	Hf
Units	ppm	ppm	ppm	ppm	ppm	ppm	wt%	ppm	ppm	ppm	ppm	wt%	ppm	ppm	wt%	wt%	ppm	ppm	ppm	ppm	ppm	ppm	ppm	ppm	ppm	ppm	ppm	ppm	ppm	ppm	ppm	ppm	ppm	ppm	ppm	ppm	ppm	ppm	ppm	ppm	ppm	ppm	ppm	ppm	ppm	ppm	ppm	ppm	ppm
RGPMR powder	3.18981	5.23659	7.14429	48.8517	55.3233	294.062	1.01786	<LOD	13.0091	1210.4	291.07	95.2979	1418.06	2767.33	<LOD	1.01229	29.9346	4.13689	12.6858	0.843472	0.716106	<LOD	0.477672	0.646743	0.984976	739.13	9148.25	7.77459	3.90886	<LOD	487.908	39.4006	0.0149631	1.04083	<LOD	<LOD	<LOD	<LOD	<LOD	<LOD	<LOD	<LOD	<LOD	<LOD	<LOD	<LOD	<LOD	<LOD	36.5779
RGPMR powder	3.82114	3.74585	5.12307	184.323	646.287	637.389	1.18141	81.6094	54.882	146.944	227.417	94.9243	1294.39	2723.24	<LOD	1.11764	38.45	4.82564	12.836	0.3318	<LOD	0.118003	0.553197	0.586378	1.84446	490.607	9314.52	6.27707	3.92365	0.228593	1333.97	105.635	0.082253	1.85133	<LOD	<LOD	<LOD	<LOD	<LOD	<LOD	<LOD	<LOD	<LOD	<LOD	<LOD	<LOD	<LOD	<LOD	24.84
RGPMR powder	17.3381	5.06586	13.3259	127.07	88.0182	332.656	1.041	186.469	80.5711	4068.91	223.744	94.7808	1465.88	2721.61	<LOD	1.10944	34.9394	7.55104	18.4329	0.258448	3.51311	2.32919	0.830228	0.617629	1.12922	500.752	8264.19	158.753	3.8888	0.384856	1011.06	92.2364	0.0841301	2.82922	<LOD	<LOD	<LOD	<LOD	<LOD	<LOD	<LOD	<LOD	<LOD	<LOD	<LOD	<LOD	<LOD	<LOD	21.9599
RGPMR powder	<LOD	5.26553	1.67789	92.5411	80.1243	347.164	1.01299	24.5173	67.8068	175.994	266.608	95.2847	1518.57	2864.52	<LOD	1.19506	41.3071	5.99226	21.3843	0.771002	<LOD	1.44087	0.10355	0.710055	2.26637	772.271	8650.16	122.713	4.35454	0.400205	366.264	26.7936	<LOD	0.989705	<LOD	<LOD	<LOD	<LOD	<LOD	<LOD	<LOD	<LOD	<LOD	<LOD	<LOD	<LOD	<LOD	<LOD	32.6382
RGPMR powder	<LOD	3.32573	14.1543	67.0819	72.7424	288.806	1.15847	15.3492	10.8475	<LOD	242.433	95.5802	1500.09	2531.13	<LOD	1.04431	35.9661	4.9869	15.1677	0.498312	4.80455	2.41316	0.0610888	0.578106	0.877951	598.625	7478.17	121.748	3.44331	1.15605	581.983	40.0297	0.0264787	1.75133	<LOD	<LOD	<LOD	<LOD	<LOD	<LOD	<LOD	<LOD	<LOD	<LOD	<LOD	<LOD	<LOD	<LOD	28.0262
RGPMR powder	22.7801	5.10954	27.8224	211.076	103.019	503.08	1.2496	102.994	63.9436	787.888	281.762	94.9702	1430.64	2649.77	<LOD	1.11377	41.687	5.28093	16.5145	0.214595	1.41549	<LOD	0.522558	1.17771	8.22479	793.179	8606.11	140.937	3.41564	0.28269	440.452	35.7564	0.0755495	5.1289	<LOD	<LOD	<LOD	<LOD	<LOD	<LOD	<LOD	<LOD	<LOD	<LOD	<LOD	<LOD	<LOD	<LOD	37.4161
RGPMR powder	<LOD	1.69617	20.8353	146.615	120.935	449.405	1.03712	48.2518	58.7344	652.314	247.737	95.1569	1398.1	2590.64	<LOD	1.13011	48.1726	5.31205	13.2227	0.528384	2.33482	1.24694	0.200841	0.967763	7.67214	631.552	8876	122.108	3.6151	0.458271	1090.35	86.4253	0.0236474	4.15552	<LOD	<LOD	<LOD	<LOD	<LOD	<LOD	<LOD	<LOD	<LOD	<LOD	<LOD	<LOD	<LOD	<LOD	31.1597
RGPMR powder	<LOD	2.2138	19.7452	71.0563	83.4896	323.354	1.01768	85.2775	28.6901	236.266	294.8	95.4583	1456.95	2596.72	<LOD	1.06864	33.6971	4.86196	15.2929	0.447881	1.14537	2.83381	0.201444	0.850435	2.10466	763.12	8547.11	121.675	3.24044	<LOD	377.831	25.1922	<LOD	2.40293	<LOD	<LOD	<LOD	<LOD	<LOD	<LOD	<LOD	<LOD	<LOD	<LOD	<LOD	<LOD	<LOD	<LOD	36.6935
RGPMR powder	12.5785	2.54323	27.0251	55.2328	66.5247	267.211	0.937475	<LOD	30.766	863.452	311.395	95.5691	1417.62	2536.32	<LOD	0.959217	26.3524	4.05771	12.556	0.712427	1.04434	1.03029	0.607677	0.528431	2.17834	902.634	8857.7	92.4851	3.34571	<LOD	212.66	16.0688	<LOD	2.21848	<LOD	<LOD	<LOD	<LOD	<LOD	<LOD	<LOD	<LOD	<LOD	<LOD	<LOD	<LOD	<LOD	<LOD	42.999
RGPMR powder	15.5818	2.90682	10.7732	189.621	144.825	474.316	1.21112	15.9253	61.9295	65.5122	233.241	95.2028	1464.39	2560.19	<LOD	1.1205	57.7181	5.80341	26.4699	0.695833	<LOD	0.408029	0.219731	1.57133	3.29814	607.554	7937.15	121.31	4.12738	0.443048	946.365	87.3033	0.0433538	4.65214	<LOD	<LOD	<LOD	<LOD	<LOD	<LOD	<LOD	<LOD	<LOD	<LOD	<LOD	<LOD	<LOD	<LOD	28.6792
RGPMR powder	11.4718	2.55644	5.90954	81.3979	67.7217	299.227	0.911761	41.45	34.7613	<LOD	285.258	95.7445	1437.59	2531.1	<LOD	0.961608	28.9934	3.91669	14.1792	0.312308	0.0570856	<LOD	<LOD	0.562731	1.68799	863.806	8520.24	80.5805	4.163	0.779974	303.15	26.0331	<LOD	3.25344	<LOD	<LOD	<LOD	<LOD	<LOD	<LOD	<LOD	<LOD	<LOD	<LOD	<LOD	<LOD	<LOD	<LOD	41.5033
Average	12.3945	3.60596	13.9578	115.897	139.001	383.334	1.07059	66.8715	45.9947	911.964	264.133	95.27	1436.57	2642.96	#DIV/0!	1.07569	37.9289	5.15686	16.2493	0.510406	1.87886	1.47754	0.377799	0.799755	2.93355	696.657	8563.6	99.6691	3.76604	0.51671	650.182	52.8068	0.0500537	2.75217	#DIV/0!	#DIV/0!	#DIV/0!	#DIV/0!	#DIV/0!	#DIV/0!	#DIV/0!	#DIV/0!	#DIV/0!	#DIV/0!	#DIV/0!	#DIV/0!	#DIV/0!	#DIV/0!	32.9539
sd	6.56367	1.28659	8.49815	56.0432	162.332	111.381	0.106871	51.8558	22.2988	1175.7	29.1334	0.288136	56.5999	106.75	#DIV/0!	0.0708408	8.69073	0.995424	4.14714	0.209012	1.48148	0.914255	0.241278	0.310139	2.4551	132.886	501.044	47.9119	0.356425	0.286277	359.406	31.3415	0.0277163	1.33962	#DIV/0!	#DIV/0!	#DIV/0!	#DIV/0!	#DIV/0!	#DIV/0!	#DIV/0!	#DIV/0!	#DIV/0!	#DIV/0!	#DIV/0!	#DIV/0!	#DIV/0!	#DIV/0!	6.42158
RSD (%)	52.9564	35.6795	60.8844	48.3561	116.785	29.056	9.98246	77.5454	48.4812	128.92	11.0298	0.302441	3.93993	4.03903	#DIV/0!	6.58562	22.9132	19.3029	25.522	40.9502	78.8502	61.877	63.8641	38.7793	83.6903	19.0748	5.85085	48.071	9.4642	55.4037	55.2777	59.3513	55.3731	48.6749	#DIV/0!	#DIV/0!	#DIV/0!	#DIV/0!	#DIV/0!	#DIV/0!	#DIV/0!	#DIV/0!	#DIV/0!	#DIV/0!	#DIV/0!	#DIV/0!	#DIV/0!	#DIV/0!	19.4866
n	7	11	11	11	11	11	11	9	11	9	11	11	11	11	0	11	11	11	11	11	8	8	10	11	11	11	11	11	11	8	11	11	7	11	0	0	0	0	0	0	0	0	0	0	0	0	0	0	11
[truncated: 6 more columns]

## Sheet: Table S8
Table S8 Element concentrations for the white precipitate of rutile RGPMR measured by LA–ICP–MS
Elements	Li	Be	B	Na	Mg	Al	SiO2	P	K	Ca	Sc	TiO2	V	Cr	MnO	FeO	Co	Cu	Zn	Ga	Ge	As	Rb	Sr	Y	Zr	Nb	Mo	Ag	Cd	Sn	Sb	Cs	Ba	La	Ce	Pr	Nd	Sm	Eu	Gd	Tb	Dy	Ho	Er	Tm	Yb	Lu	Hf
Units	ppm	ppm	ppm	ppm	ppm	ppm	wt%	ppm	ppm	ppm	ppm	wt%	ppm	ppm	wt%	wt%	ppm	ppm	ppm	ppm	ppm	ppm	ppm	ppm	ppm	ppm	ppm	ppm	ppm	ppm	ppm	ppm	ppm	ppm	ppm	ppm	ppm	ppm	ppm	ppm	ppm	ppm	ppm	ppm	ppm	ppm	ppm	ppm	ppm
white precipitate	43.0274	<LOD	<LOD	92.9824	230.015	779.473	1.30311	295.063	54.4671	<LOD	22.8017	95.4143	1540.75	76.1005	<LOD	0.146932	1.79543	2127.27	36.1836	0.611813	<LOD	2.38911	2.24371	32.0088	0.096952	8.84483	11913.3	14.0816	6.2901	1.88101	316.852	247.48	<LOD	1.40715	<LOD	<LOD	<LOD	<LOD	<LOD	<LOD	<LOD	<LOD	<LOD	<LOD	<LOD	<LOD	<LOD	<LOD	0.197234
white precipitate	13.9267	<LOD	1.9466	28.6488	49.7947	12.0688	0.559509	301.94	18.6757	<LOD	27.7556	96.3101	1207.26	48.8205	<LOD	0.171216	0.356939	459.829	21.2466	0	<LOD	5.41957	0.461469	0.27837	0.0585491	4.26547	11973.1	9.63865	8.75542	<LOD	280.778	209.193	0.0787731	0.354755	<LOD	<LOD	<LOD	<LOD	<LOD	<LOD	<LOD	<LOD	<LOD	<LOD	<LOD	<LOD	<LOD	<LOD	0.268362
white precipitate	20.6717	<LOD	12.2321	20.0624	40.1167	54.1452	0.40016	357.687	19.9419	<LOD	25.6153	96.7286	1040.56	34.7154	<LOD	0.162503	0.407596	350.56	18.5083	0.247354	<LOD	0.944441	<LOD	25.3626	0.0729277	5.41083	11542.1	8.5754	5.8813	0.282174	310.111	234.008	0.193938	0.21251	<LOD	<LOD	<LOD	<LOD	<LOD	<LOD	<LOD	<LOD	<LOD	<LOD	<LOD	<LOD	<LOD	<LOD	0.267779
white precipitate	<LOD	<LOD	11.8445	56.5494	49.6435	33.9803	0.715316	262.851	10.1816	1796.24	15.4078	96.8016	1124.91	37.9175	<LOD	0.160499	0.577142	710.957	37.0003	0.632969	<LOD	8.91538	0.22066	0.622085	0.11125	2.35887	8444.3	9.55983	5.22661	0.429835	325.277	213.703	0.0688294	2.05712	<LOD	<LOD	<LOD	<LOD	<LOD	<LOD	<LOD	<LOD	<LOD	<LOD	<LOD	<LOD	<LOD	<LOD	0.0272702
white precipitate	30.3399	0.850355	6.6427	93.8785	78.8226	68.6777	0.932038	356.85	33.3666	1254.74	16.9675	96.1634	1159.33	24.7107	<LOD	0.167156	0.437646	1489.44	22.0749	0.063793	8.13816	<LOD	0.0237387	0.153042	0.0273734	3.14459	11043.6	12.2143	4.83254	<LOD	346.458	221.24	0.0756219	1.06766	<LOD	<LOD	<LOD	<LOD	<LOD	<LOD	<LOD	<LOD	<LOD	<LOD	<LOD	<LOD	<LOD	<LOD	0.0671912
Average	26.9914	0.850355	8.16648	58.4243	89.6786	189.669	0.782027	314.878	27.3266	1525.49	21.7096	96.2836	1214.56	44.4529	#DIV/0!	0.161661	0.714952	1027.61	27.0027	0.311186	8.13816	4.41712	0.737393	11.685	0.0734104	4.80492	10983.3	10.814	6.19719	0.864339	315.895	225.125	0.104291	1.01984	#DIV/0!	#DIV/0!	#DIV/0!	#DIV/0!	#DIV/0!	#DIV/0!	#DIV/0!	#DIV/0!	#DIV/0!	#DIV/0!	#DIV/0!	#DIV/0!	#DIV/0!	#DIV/0!	0.165567
sd	10.9429	0	4.21503	31.0258	71.3613	295.518	0.314267	37.0435	15.4688	270.752	4.80002	0.497432	171.942	17.5951	#DIV/0!	0.00825237	0.545156	678.76	7.92229	0.266847	0	3.05825	0.883378	14.0401	0.0294161	2.26799	1312.03	2.02996	1.3753	0.721416	21.3994	13.9857	0.0518827	0.681523	#DIV/0!	#DIV/0!	#DIV/0!	#DIV/0!	#DIV/0!	#DIV/0!	#DIV/0!	#DIV/0!	#DIV/0!	#DIV/0!	#DIV/0!	#DIV/0!	#DIV/0!	#DIV/0!	0.100817
RSD (%)	40.5423	0	51.6138	53.1042	79.5745	155.807	40.1862	11.7644	56.607	17.7485	22.1102	0.516633	14.1567	39.5814	#DIV/0!	5.10473	76.2508	66.0523	29.3388	85.7515	0	69.2362	119.797	120.155	40.0708	47.2014	11.9457	18.7716	22.1923	83.4645	6.77422	6.21243	49.7481	66.8266	#DIV/0!	#DIV/0!	#DIV/0!	#DIV/0!	#DIV/0!	#DIV/0!	#DIV/0!	#DIV/0!	#DIV/0!	#DIV/0!	#DIV/0!	#DIV/0!	#DIV/0!	#DIV/0!	60.8921
n	4	1	4	5	5	5	5	5	5	2	5	5	5	5	0	5	5	5	5	5	1	4	4	5	5	5	5	5	5	3	5	5	4	5	0	0	0	0	0	0	0	0	0	0	0	0	0	0	5
[truncated: 6 more columns]
